1                   **Alcohol Cues Elicit Different Abnormalities in Brain**  
2                   **Networks of Abstinent Men and Women**  
3                   **with Alcohol Use Disorders**

4  
5           Kayle S. Sawyer, Ph.D.<sup>1,2,3,4</sup>, Marlene Oscar-Berman, Ph.D.<sup>1,2,3</sup>, Susan Mosher Ruiz, Ph.D.<sup>2</sup>,  
6           Ksenija Marinkovic, Ph.D.<sup>5</sup>, Mary M. Valmas, Ph.D.<sup>2</sup>, and Gordon J. Harris, Ph.D.<sup>3,6</sup>

7  
8           <sup>1</sup>Psychology Research Service, VA Boston Healthcare System, Boston, MA;

9           <sup>2</sup>Department of Anatomy & Neurobiology, Boston University School of Medicine, Boston, MA;

10           <sup>3</sup>Department of Radiology, Massachusetts General Hospital, Boston, MA;

11           <sup>4</sup>Sawyer Scientific, LLC, Boston, MA

12           <sup>5</sup>Department of Psychology, San Diego State University, San Diego, CA;

13           <sup>6</sup>Department of Radiology, Harvard Medical School, Boston, MA;

14  
15  
16  
17   **Corresponding Author:**     Kayle Sawyer, Ph.D.  
18                                     Boston University School of Medicine, L-1004  
19                                     72 East Concord Street  
20                                     Boston, MA 02118  
21                                     USA  
22                                     Fax: +1 857-364-2214; Phone: +1 857-364-4005  
23                                     Email: [kslays@bu.edu](mailto:kslays@bu.edu)

24  
25   **Keywords:** Alcoholism; reward; fMRI; gender; memory; emotion

26   **Running Title:** Gender, brain responses, and alcohol

27   **Highlights:** Brain reward regions activate highly when individuals with a history of alcohol use  
28   disorders view alcoholic beverages.

29   The brain regions identified subserve vision, memory, and judgement.

30   Opposite abnormalities in activation patterns appeared for alcoholic men and women.  
31

32

33 **Abstract**

34 We employed fMRI in 84 men and women with and without a history of alcohol use disorders  
35 (ALC and NC, respectively), to explore how gender interacts with alcoholism as reflected in  
36 brain activity elicited by alcohol cues. Brain activation was measured in a working memory task  
37 (delayed matching-to-sample) with emotional faces as the sample and match cues. During the  
38 delay period, intervening distractors were either reward-salient cues (alcoholic beverages) or  
39 neutral cues (nonalcoholic beverages or scrambled pictures). ALC women (ALCw) had higher  
40 accuracy than ALC men (ALCm). Analyses of scans during the viewing of distractor images  
41 revealed significant group-by-gender interactions. Compared to NC men, ALCm evidenced  
42 lower activation contrast between reward-salient cues and neutral cues in *default mode network*  
43 regions (including superior prefrontal and precuneus areas), while ALCw had more activation  
44 than NC women. Similar interactions were observed for *task-regions* (including superior parietal,  
45 lateral occipital, and prefrontal areas). Region of interest analyses showed that the ALC group  
46 had significantly higher levels of activation throughout reward-related circuitry during alcohol  
47 distractor interference than during scrambled picture interference. These results suggest that  
48 abstinent ALCm and ALCw differ in processing reward-salient cues, which can impact treatment  
49 and recovery.

50

## 51 **1. Introduction**

52 Alcohol use disorders (AUD) have been associated with deficits in cognitive and  
53 emotional functions (Oscar-Berman *et al.*, 2014). Because of their reward salience, alcohol cues  
54 such as pictures of alcoholic beverages elicit attentional bias and brain activation in individuals  
55 with AUD (Carter & Tiffany, 1999; Goldstein & Volkow, 2002; Schacht *et al.*, 2013). Alcohol  
56 cues induce a hyperattentive state with attention drawn to the rewarding stimuli (Townshend &  
57 Duka, 2001; Franken, 2003; Field & Cox, 2008; Vollstädt-Klein *et al.*, 2011). Therefore, the  
58 cues selectively interfere with other cognitive abilities such as memory. Importantly, attentional  
59 bias toward alcohol-related stimuli also has been associated with level of craving, consumption,  
60 dependence, and physiological arousal (Sharma *et al.*, 2001; Ryan, 2002; Field *et al.*, 2004; Field  
61 & Eastwood, 2005; Bordnick *et al.*, 2008; Sinha *et al.*, 2009; Wiers *et al.*, 2014; Sawyer *et al.*,  
62 2015).

63 Functional magnetic resonance imaging (fMRI) studies of attentional biasing, and  
64 specifically cue sensitivity, have often included either only men with and without a history of  
65 AUD (ALC and NC groups), or groups of men and women with sample sizes too small to  
66 examine gender effects (Fryer *et al.*, 2013; Schacht *et al.*, 2013). However, gender impacts the  
67 ways in which alcohol affects the brain and behavior (Becker *et al.*, 2017; Sawyer *et al.*, 2017,  
68 2018, 2019; Seitz *et al.*, 2017; Rivas-Grajales *et al.*, 2018; Hoffman *et al.*, 2019; Kaag *et al.*,  
69 2019; Fama *et al.*, 2020; Verplaetse *et al.*, 2021), due to interactions with physiological and  
70 social factors (Ruiz & Oscar-Berman, 2015; Mosher Ruiz *et al.*, 2017). In the present study, we  
71 examined gender differences using a delayed matching-to-sample (DMTS) task (Dolcos &  
72 McCarthy, 2006) with alcohol cues serving as distractor stimuli, in a cohort of ALC and NC men  
73 and women (AUDm, AUDw, NCm, and NCw). The DMTS task requires an attention-demanding

74 kind of memory called “working memory.” In this study, the participants were required to  
75 remember photographs of emotional faces while distracting pictures of alcoholic beverages,  
76 nonalcoholic beverages, or scrambled images intervened during the delay period. We chose faces  
77 as the sample stimuli for two primary reasons. First, in a previous study (Marinkovic *et al.*, 2009)  
78 we found that men with AUD had abnormally low brain activity in temporal limbic regions when  
79 viewing faces, and second, we used the same dataset that we had acquired for a prior report  
80 (Oscar-Berman *et al.*, 2019) in which we described the brain’s responses to the initial to-be-  
81 encoded emotional faces phase (the sample) of the DMTS task. For the present study, the data  
82 derived from the delay and match portions of the task allowed us to test the attentional biasing  
83 effect, wherein we expected alcohol cues, more than other cue types, to impair performance on  
84 memory for face identity.

85         Functional MRI tasks activate multiple brain networks, and abnormalities in the default  
86 mode network (DMN) have been implicated in AUD and in psychiatric disorders (Menon, 2011;  
87 Zhang & Volkow, 2019). The DMN has been observed to be more active during story telling,  
88 reading and memory tasks, imagining future scenarios, self-reference, rumination, and when the  
89 mind wanders while staring at a fixation cross during fMRI scanning (Tops *et al.*, 2014; Beaty *et*  
90 *al.*, 2016; Buckner & DiNicola, 2019). We refer to the DMN regions as *fixation-regions* because  
91 they are more active during the idle delay intervals when the fixation stimulus is presented  
92 between DMTS trials than during stimulus presentations. Vertex-wise analyses have revealed  
93 that cortical fixation-regions include: (1) an “anterior hub,” consisting of portions of the rostral  
94 anterior cingulate cortex (ACC), ventromedial prefrontal cortex, and medial superior frontal  
95 cortex; (2) a “posterior hub,” which includes portions of the posterior cingulate and precuneus,  
96 (3) the temporoparietal junction, which covers parts of the angular gyrus and inferior parietal

97 lobule; and (4) the superior and middle temporal gyrus region (Margulies *et al.*, 2016; Buckner  
98 & DiNicola, 2019; Uddin *et al.*, 2019).

99 In addition to the DMN regions, we used vertex-wise analyses to examine *task-regions*,  
100 which are more engaged during the DMTS task than while looking at unengaging fixation  
101 crosses. Literature on distractor interference during working memory has suggested that task-  
102 regions involve a distributed network including prefrontal cortex, along with dorsal and ventral  
103 visual association cortex, which are necessary for attentional functioning (Loeber *et al.*, 2009)  
104 and for inhibiting distracting visual stimuli (Jha *et al.*, 2004; Clapp *et al.*, 2010). Additional task-  
105 regions involved in attention, working memory, and emotional processing, include the dorsal  
106 ACC and lateral prefrontal areas. The dorsal ACC in particular has been implicated in craving  
107 and attentional biasing (Goldstein & Volkow, 2011).

108 In advance of any analyses, we used prior literature to select ten *a priori* anatomically-  
109 defined regions of interest (ROI) involved in alcohol cue exposure, distractor interference,  
110 craving, reward processing and salience, or working memory for emotional faces. The first nine  
111 ROI are the dorsolateral prefrontal cortex (DLPFC), ventrolateral prefrontal cortex (VLPFC),  
112 orbitofrontal cortex (OFC), insular cortex, parahippocampal gyrus, hippocampus, amygdala,  
113 fusiform, and ACC. Previous studies provide support for each of those nine *a priori* ROI (George  
114 *et al.*, 2001; Wrase *et al.*, 2002; Tapert *et al.*, 2003; Myrick *et al.*, 2004; Heinz *et al.*, 2007; Ray  
115 *et al.*, 2010; Goldstein & Volkow, 2011; Schacht *et al.*, 2013; Field *et al.*, 2014; Alba-Ferrara *et*  
116 *al.*, 2016; Sawyer *et al.*, 2020). The tenth ROI is the “extended reward and oversight system”  
117 (EROS) as described and named in our previous papers (Makris *et al.*, 2008; Sawyer *et al.*,  
118 2017). The EROS ROI is a single large but discontinuous composite ROI that had been created  
119 by combining 11 regions (seven of the ROI noted above, all but the VLPFC and fusiform), plus

120 an additional four: nucleus accumbens, ventral diencephalon, subcallosal cortex, and temporal  
121 pole. For each of the ten ROI, we intended to confirm findings from each of the aforementioned  
122 studies that had identified abnormal activation by alcohol cues in AUD, and additionally to  
123 investigate differences between men and women. We expected lower brain activation in the ALC  
124 group in regions involved in facial identity and inhibition of distractor interference, but higher in  
125 regions responsible for reward salience.

126 In summary, we investigated brain activation for ten ROI, and for vertex-wise cortical  
127 analyses of fixation-regions and task-regions. We examined the accuracy of the participants'  
128 memory for the face identities after exposure to attentionally salient pictures to test our  
129 hypothesis that alcohol cues would distract the ALC group more than the NC group. We  
130 determined how brain regions were activated by the distractor contrasts, how the contrasts  
131 differed for ALC and NC groups, and how those abnormalities varied by gender. We  
132 hypothesized that attentional biasing would be evident for the ALC group in the form of stronger  
133 brain activity contrasts (alcoholic beverage cues compared to nonalcoholic and scrambled  
134 stimuli). Regarding gender differences, we made predictions based upon previous work in our  
135 laboratory wherein we found that brain regions of ALCw (compared to NCw) were overactive in  
136 response to highly charged emotional stimuli (Sawyer *et al.*, 2019). We hypothesized that the  
137 ALCw would evidence hyperactivation to emotionally valent stimuli, whereas the activation  
138 contrasts for ALCm would be weaker. We also expected to replicate prior results (Marinkovic *et*  
139 *al.*, 2009; Sawyer *et al.*, 2019) showing lower responses in ALCm than NCm.

140

141

## 142 **2. Materials and Methods**

### 143 *2.1 Participants*

144 Participants in this study included 42 abstinent long-term ALC individuals (21 ALCw)  
145 and 42 NC controls (21 NCw), with comparable age, education, and IQ (see Table 1 in the  
146 Results). Participants were recruited through flyers placed in treatment and after-care facilities,  
147 the Boston VA Healthcare System facility, Massachusetts General Hospital, the Boston  
148 University School of Medicine, and in public places (*e.g.*, churches, stores), as well as through  
149 newspaper and internet advertisements. This study was reviewed and approved by human studies  
150 Institutional Review Boards at the affiliated institutions. All participants gave written informed  
151 consent prior to participation, and they were compensated for their time.

152 Selection procedures included a telephone interview to determine age, education, health  
153 and alcohol and drug use history, including prescription drugs. Participants were right-handed,  
154 had normal or corrected-to-normal vision, and spoke English as their first language (or had  
155 acquired English as a second language by age five). Current drug use excepting nicotine was  
156 cause for exclusion, as were history of alcohol-related liver disease, epilepsy, head trauma  
157 resulting in loss of consciousness for 15 minutes or more, HIV, schizophrenia, or metal implants.

158

### 159 *2.2 Neuropsychological Assessment*

160 Neuropsychological testing was conducted at the Department of Veterans Affairs (VA)  
161 Boston Healthcare System facility prior to scanning. Participants completed a medical history  
162 interview, vision test, handedness questionnaire (Briggs & Nebes, 1975), and a battery of tests as  
163 described below. All subjects were screened using the Hamilton Rating Scale for Depression  
164 (Hamilton, 1960) and the Diagnostic Interview Schedule for the DSM-IV (Robins *et al.*, 2000).

165 The majority of participants also were administered the Wechsler Adult Intelligence Scale  
166 (WAIS-III) and the Wechsler Memory Scale (WMS-III) (Wechsler, 1997). Four participants  
167 (two ALCw and two ALCm) received the WAIS-IV and WMS-IV (Holdnack & Drozdick,  
168 2010), and WMS-III scores were not obtained from one ALCm. The scores for these participants  
169 were adjusted to account for differences in scoring outcomes relative to the earlier versions of  
170 the scales. Because craving for the rewarding effects of alcohol is known to serve as a trigger for  
171 relapse in those recovering from AUD (Schneider *et al.*, 2001), and alcohol cue exposure in  
172 particular is known to be related to relapse (Lubman, 2007), all participants were administered  
173 the Penn Alcohol Craving Scale (Flannery *et al.*, 1999) immediately before and approximately  
174 two weeks following the scan to assess any changes in alcohol craving patterns.

175

### 176 *2.3 Alcohol Screening*

177 The ALC participants met criteria for alcohol abuse or dependence, and consumed 21 or  
178 more alcoholic drinks per week for five or more years. Extent of alcohol use was assessed by  
179 calculating Quantity Frequency Index (QFI) scores (Cahalan *et al.*, 1969). QFI scores  
180 approximate the number of drinks consumed per day, and take into consideration the amount,  
181 type, and frequency of alcohol consumption either over the last six months (NC participants), or  
182 over the six months preceding cessation of drinking (ALC participants), and yields an estimate of  
183 ounces of ethanol per day. To remove the influence of current alcohol abuse, ALC participants  
184 must have been abstinent for at least four weeks before the scan date to be included. The ALC  
185 participants did not display symptoms of Korsakoff's Syndrome nor dementia (Oscar-Berman &  
186 Maleki, 2019). Potential NC participants who had consumed 15-20 drinks per week for any  
187 length of time or who engaged in binge drinking were disqualified.



188

## 189 2.4 Functional Imaging Task

190 All participants were given a delayed matching-to-sample memory task (Dolcos &  
191 McCarthy, 2006) in a magnetic resonance imaging (MRI) scanner, whereby they were asked to  
192 encode two faces that both had one of three emotional valences: positive, neutral, or negative  
193 (Figure 1). The face stimuli were shown in grayscale and were taken from a set of faces used in a  
194 previous study (Marinkovic *et al.*, 2009). These faces were displayed simultaneously for three  
195 seconds, followed by an asterisk (\*) for one second. Subjects were asked to maintain these faces  
196 in memory while a colored distractor stimulus was shown. On different trials, the distractor  
197 stimulus was either a picture of an alcoholic beverage (*alcbbev*; beer, wine, liquor, or mixed  
198 drink), a picture of a nonalcoholic beverage (*nonalcbbev*; water, juice, milk, soda, coffee, tea,  
199 etc.), or a scrambled nonsense picture (*scrambled*). Alcoholic and nonalcoholic beverage pictures  
200 were a combination of images used with permission from the Normative Appetitive Picture  
201 System (NAPS) (Stritzke *et al.*, 2004), and other previously published works on alcohol cues  
202 (Grüsser *et al.*, 2000; Wrase *et al.*, 2002; Myrick *et al.*, 2004). Additional distractor images were  
203 modified from digital photographs taken at bars, liquor stores, and convenience stores. The  
204 scrambled images were created by inverting half the alcoholic and half the nonalcoholic  
205 beverage images and distorting them until they were not recognizable as any particular object,  
206 while preserving a match of primary visual characteristics. Each distractor picture was shown for  
207 three seconds, followed by an asterisk (\*) for one second. Following the distractor picture, a  
208 single probe face was shown for two seconds, and the participants were instructed to report  
209 whether this face was one of the two faces they had just seen.

210 Each trial was 10 seconds in length, and was followed by a variable delay period (with a  
211 mean duration of 10 seconds, ranging from 2-22 seconds) during which the subject saw a set of  
212 crosshairs (+++) serving as a visual fixation. The task was divided into nine runs, each of which  
213 contained 18 trials. There were nine trial types made up of each combination of face valence and  
214 distractor type (e.g., positive faces followed by alcohol distractor). Each emotion-distractor  
215 combination appeared twice per run. The stimulus order and variable inter-trial intervals were  
216 determined using *optseq2* (<http://surfer.nmr.mgh.harvard.edu/optseq>), which optimizes statistical  
217 efficiency and hemodynamic response estimate accuracy for event-related experimental designs  
218 (Dale, 1999). In total, there were 54 trials for each distractor type (combined across facial  
219 expressions) and each face valence (combined across distractor types), for a total of 162 trials  
220 across the entire scan. The stimulus faces were balanced to contain 50% male and 50% female  
221 faces. Within a trial, the two encoded faces and probe face were matched on emotional  
222 expression and gender. This way, on match trials the probe facial image was identical to one of  
223 the encoded images, and on mismatch trials the facial identity changed but the emotional  
224 expression and gender did not.

225 The probe face matched one of the encoded faces on 50% of the trials, and  
226 match/mismatch trials appeared in a randomized order within each run. Responses were made by  
227 pressing one of two buttons with the index finger (match) or middle finger (mismatch) of the  
228 right hand. Participants were instructed to respond as quickly as possible without sacrificing  
229 accuracy. Additionally, participants could immediately correct a response by pressing the  
230 opposite button. To ensure the distractor images were viewed by all participants, they were told  
231 that it was necessary to pay attention to the pictures shown in between the faces on each trial, as  
232 they would be questioned about those images following the scan.

233

## 234 *2.5 Behavioral Task Analyses*

235 Responses to the face memory task were analyzed on the first level (individual subjects)  
236 using custom Excel templates. Trials were organized by Distractor type, facial Emotion, and  
237 Face Gender. Each trial was scored as correct, incorrect, or miss (*i.e.*, no response). When more  
238 than one response was made to a trial, the last response type (*i.e.*, yes/match or no/nonmatch)  
239 was accepted as the final answer, provided that the final response was at least 200 ms after the  
240 preceding response and no more than 10 s following the preceding response. When a single  
241 response was recorded and the reaction time was less than 200 ms, the trial was scored as a miss.  
242 For each participant, a mean overall reaction time (regardless of trial type) was calculated.  
243 Reaction times that exceeded three standard deviations from this mean were excluded from  
244 reaction time calculations by trial type. Participants' patterns of responses were analyzed for  
245 consecutive misses to assure that they remained awake throughout the task. Three separate runs  
246 were identified, each in a different participant, wherein greater than five consecutive trials were  
247 missed; these runs were excluded from behavioral analyses.

248 Second level (group) effects on percent correct and reaction time (correct trials) were  
249 investigated using SPSS Version 17.0 (IBM, Chicago, IL, USA). Repeated-measures analyses of  
250 variance (ANOVA) were carried out with between-subjects factors of Group (ALC or NC) and  
251 Gender (female participant or male participant) and within-subjects factors of Distractor (alcbev,  
252 nonalcbev, or scrambled), Emotion (positive, negative, or neutral), and Face Gender (female face  
253 or male face).

254

## 255 2.6 Image Acquisition

256 Imaging was conducted at the Massachusetts General Hospital's Athinoula A. Martinos  
257 Center for Biomedical Imaging in Charlestown, MA. Data were acquired on a 3 Tesla Siemens  
258 (Erlangen, Germany) MAGNETOM Trio Tim MRI scanner with a 12-channel head coil. Sagittal  
259 T1-weighted MP-RAGE scans (TR = 2530 ms, TE = 3.39 ms, flip angle = 7°, FOV = 256 mm,  
260 slice thickness = 1.33 mm, slices = 128, matrix = 256 x 192) were collected for all subjects. For  
261 most participants, two such volumes were collected and averaged to aid in motion correction. An  
262 auto-align localizer was employed to adjust the acquired slices such that they ran parallel to an  
263 imaginary plane between the anterior and posterior commissures. Echo planar functional MRI  
264 blood oxygen level dependent (BOLD) scans were collected axially with 5 mm slice thickness  
265 and 3.125 x 3.125 mm in-plane resolution (64 x 64 matrix), allowing for whole brain coverage  
266 (32 interleaved slices, TR = 2 s, TE = 30 ms, flip angle = 90°). The event-related design included  
267 18 trials per run with a total of nine runs. Within each six-minute run, 180 T<sub>2</sub>\*-weighted volumes  
268 were collected. Functional volumes were auto-aligned to the anterior/posterior commissure line  
269 to ensure a similar slice prescription was employed across participants. Prospective Acquisition  
270 Correction (3D-PACE) was applied during collection of the functional volumes to minimize the  
271 influence of participants' body motion (Thesen *et al.*, 2000). An IBM ThinkPad (Windows XP)  
272 running Presentation version 11.2 (NeuroBehavioral Systems, Albany, CA) software was used  
273 for visual presentation of the experimental stimuli and collection of participants' responses.  
274 Stimuli were back-projected onto a screen at the back of the scanner bore and were viewed by  
275 the participants through a mirror mounted to the head coil. All participants wore earplugs to  
276 attenuate scanner noise.

277

## 278 2.7 Structural Image Processing

279 Structural MP-RAGE image analyses were performed for all participant data using the  
280 FreeSurfer (version 4.5.0) image analysis suite (<http://surfer.nmr.mgh.harvard.edu>). A multi-  
281 stage cortical surface reconstruction process was run on the two collected T1-weighted MP-  
282 RAGE scans (Dale *et al.*, 1999), starting with motion correction, intensity normalization (Sled *et*  
283 *al.*, 1998), Talairach registration (Talairach & Tournoux, 1988), skull stripping (Ségonne *et al.*,  
284 2004), and segmentation (Fischl *et al.*, 2002) of white matter, gray matter, and ventricles.  
285 Subsequently, boundaries were calculated delineating where gray and white matter meet, and  
286 where gray matter adjoins cerebrospinal fluid (“pial surfaces”) based on maximal shifts in image  
287 intensity between tissue types. These boundaries, as well as the subcortical segmentations, were  
288 visually inspected on each coronal slice for every subject, and manual interventions (*e.g.*, white  
289 matter volume corrections) were made when needed. The surface boundaries were used to  
290 generate computationally inflated two-dimensional cortical surface models, which allowed  
291 individual subjects to be registered to a spherical atlas by utilizing each subject’s cortical folding  
292 patterns. This registration was used to align the cortical geometry of all subjects within a group.  
293 Creation of these cortical surface models allowed improved data visualization as well as  
294 improved accuracy of within-group co-registration relative to an affine morph procedure (Fischl  
295 *et al.*, 1999). The cortical surface models were employed in an automated parcellation procedure  
296 that divides the surface into subregions based on gyral and sulcal anatomy. The Destrieux atlas  
297 parcellation for FreeSurfer (Destrieux *et al.*, 2010) was used to define anatomical ROI in the  
298 functional analyses.  
299

## 300 *2.8 Functional Image Processing and Statistical Analyses*

301           Effects of Group, Gender, Distractor, and Emotion on the BOLD signal were evaluated  
302 using both a whole-brain cluster analysis as well as ROI analyses. Processing of the functional  
303 data was performed using the FreeSurfer Functional Analysis Stream (FS-FAST) version 5.3,  
304 SPSS Version 17.0, and Matlab 7.4.0.

305

### 306 **2.8.1 First-Level Functional Analyses**

307           Preprocessing of the functional images for first-level (individual subject) FS-FAST  
308 analysis included motion correction, intensity normalization (Sled *et al.*, 1998), and spatial  
309 smoothing with a 5-mm Gaussian convolution kernel at full-width half-maximum. Trials were  
310 first combined across runs by distractor-emotional face valence pairs (i.e., alcbev-positive,  
311 alcbev-negative, alcbev-neutral, nonalcbev-positive, nonalcbev-negative, nonalcbev-neutral,  
312 scrambled-positive, scrambled-negative, scrambled-neutral) and then collapsed across emotional  
313 valence. The BOLD response was estimated using a Finite Impulse Response (FIR) model,  
314 which allows for estimation of the time course of activity (percent signal change for a given  
315 condition) within a vertex or ROI for the entire trial period. For each condition, estimates of  
316 signal intensity were calculated for 2 pre-trial and 10 post-trial onset TRs, for a total analysis  
317 window of 24 seconds. Motion correction parameters calculated during alignment of the  
318 functional images were entered into the analysis as external regressors. Alignment of the T2\*-  
319 weighted functional images with T1-weighted structural volumes was accomplished through an  
320 automated boundary-based registration procedure (Greve & Fischl, 2009). These automated  
321 alignments were manually inspected to ensure accuracy.

322           Statistical maps were generated for each of the 84 individual subjects for contrasts  
323 between experimental conditions. Three contrasts were used to identify DMN regions (as  
324 described below); they were made between distractor types and fixation: (1) alcbev vs. fixation,  
325 (2) nonalcbev vs. fixation, and (3) scrambled vs. fixation. Another three contrasts were used to  
326 assess cue responsivity: (1) alcbev vs. nonalcbev, (2) alcbev vs. scrambled, (3) nonalcbev vs.  
327 scrambled. Analyses of each of these contrasts included removal of prestimulus differences  
328 between the contrasted conditions by averaging the first three time points (two pre-trial onset and  
329 one post-trial onset) for each condition and subtracting this mean from each time point for that  
330 condition. Time points summed for inclusion in each contrast were chosen to reflect peak  
331 stimulus-related activity: FIR estimates of hemodynamic responses to the distractors were  
332 analyzed using a mean of the five TRs collected during the time period of 2-12 seconds post  
333 distractor onset. Since the distractor is shown 4 seconds after the trial onset, the analysis window  
334 is 6-16 seconds following trial onset (time points 3 through 8).

335

### 336 **2.8.2 Cortical Surface Cluster Analyses**

337           We investigated cue-related brain activation in two separate cortical brain networks: (1)  
338 cue reactivity in DMN regions, and (2) cue reactivity in task-regions. The brain network that was  
339 more active during presentation of the fixation cue than during the distractor images was used as  
340 our measure of DMN regions (fixation-regions). The network that was more active during the  
341 presentation of distractor images than during presentation of the fixation stimulus was used as  
342 our measure of the task-regions. In what follows, we first describe masking procedures and  
343 analyses we used to separate the networks.

344 The  $t$ -statistic maps for each condition vs. fixation were thresholded at  $p < 0.05$  vertex-  
345 wise and were used to generate binary masks (Figure 2) separating fixation-regions and task-  
346 regions, thereby forming the six masks: alcbv greater than (or less than) fixation, nonalcbv  
347 greater than (or less than) fixation, scrambled greater than (or less than) fixation. These masks  
348 were used to separate the between-distractor analyses (described below).

349 Second-level (group) analyses on cortical regions were accomplished using FS-FAST, a  
350 surface-based morphing procedure for intersubject alignment and statistics (Fischl *et al.*, 1999).  
351 Group-averaged signal intensities during each experimental condition (alcbv, nonalcbv,  
352 scrambled) relative to fixation were calculated using the general linear model in spherical space  
353 for cortical regions, and were mapped onto the canonical cortical surface *fsaverage*, generating  
354 group-level weighted random-effects  $t$ -statistic maps masked to include only the cortex.  
355 Weighted random effects models were employed to reduce noise by taking into account  
356 individual subject variance. A 5 mm smoothing kernel (full-width half-maximum) was employed  
357 for all group and intergroup maps. Cluster correction on maps showing activity for each  
358 distractor condition vs. fixation was applied using FS-FAST Monte Carlo simulation with a  
359 clusterwise threshold of  $p < 0.05$  corrected for three spaces (left hemisphere cortical, right  
360 hemisphere cortical, and subcortical). Cortical surface cluster regions were identified by the  
361 location of each cluster's peak vertex on the cortical surface according to the Desikan-Killiany  
362 atlas (Desikan *et al.*, 2006).

363 When we examined brain activation differences between the distractor types, we used  
364 three contrasts: alcbv vs. nonalcbv, alcbv vs. scrambled, and nonalcbv vs. scrambled. We  
365 investigated each direction of these contrasts separately. For example, brain regions with higher



366 activation for alcbev than nonalcbev would be analyzed separately from those regions with  
367 higher activation for nonalcbev than alcbev.

368 Intergroup comparison *t*-statistic maps were generated using FS-FAST by comparing  
369 activation levels of all of the ALC participants with levels of all of the NC participants.  
370 Additionally, Group-by-Gender interaction maps for each contrast were calculated.

371

### 372 **2.8.3 Region of Interest Analyses**

373 The anatomically-defined ROI for the distractor analyses included areas hypothesized *a*  
374 *priori* to be implicated in alcohol craving, distractor interference, and working memory for  
375 emotional faces, as described in the Introduction. These were DLPFC, VLPFC, OFC, insular  
376 cortex, parahippocampal gyrus, hippocampus, amygdala, fusiform, ACC, and the multi-regional  
377 EROS (Makris *et al.*, 2008; Sawyer *et al.*, 2017). Left and right hemisphere regions were  
378 analyzed as separate ROI.

379 Statistical preprocessing and time course visualization of ROI data were performed using  
380 scripts written for Matlab version 7.4.0. Signal intensity for each region was averaged across all  
381 vertices (for surface-based ROI) or voxels (for volume-based ROI) included in the region for  
382 each condition on the individual participant level. To compute percent signal change for each  
383 participant within an ROI, signal estimate per condition and time point was divided by the  
384 average baseline activity for that participant. Time courses were normalized at the individual  
385 subject level for each condition by taking the mean of the first three time points (two pre-trial  
386 and one post-trial onset) and subtracting this mean from each time point. Group and Group-by-  
387 Gender averages of the normalized time courses were computed for each condition, and were

388 visualized by plotting the percent signal change for each condition at each time point (*i.e.*, TR) of  
389 the trial.

390 For the distractor ROI analyses, percent signal changes of the BOLD signal within each  
391 ROI for the time window from 2 to 12 sec after distractor onset were entered as dependent  
392 variables into repeated-measures ANOVA models with between-group factors of Group (ALC or  
393 NC) and Gender (men or women) and within-subjects factor of Distractor type (alcbev,  
394 nonalcbev, or scrambled).

395

### 396 **3. Results**

#### 397 *3.1 Research Participant Characteristics*

398 Table 1 summarizes means, standard deviations, and ranges of participant demographics,  
399 drinking variables, and IQ and memory test scores.

400

|                                                                                 | ALCOHOLICS    |               |               | CONTROLS      |               |               |
|---------------------------------------------------------------------------------|---------------|---------------|---------------|---------------|---------------|---------------|
|                                                                                 | ALC           | ALCw          | ALCm          | NC            | NCw           | NCm           |
|                                                                                 | <i>n</i> = 42 | <i>n</i> = 21 | <i>n</i> = 21 | <i>n</i> = 42 | <i>n</i> = 21 | <i>n</i> = 21 |
| <b>Age<sup>a</sup> (years)</b>                                                  |               |               |               |               |               |               |
| <i>mean</i>                                                                     | 53.9          | 53.4          | 54.4          | 53.9          | 57.7          | 50.2          |
| <i>standard deviation</i>                                                       | 11.0          | 11.4          | 10.8          | 12.4          | 13.6          | 10.1          |
| <i>range</i>                                                                    | 26.5 - 76.7   | 26.5 - 73.0   | 26.6 - 76.7   | 25.8 - 76.9   | 25.8 - 76.9   | 29.0 - 69.6   |
| <b>Education<sup>b</sup> (years)</b>                                            |               |               |               |               |               |               |
| <i>mean</i>                                                                     | 14.7          | 15.3          | 14.1          | 15.5          | 15.6          | 15.4          |
| <i>standard deviation</i>                                                       | 2.0           | 2.0           | 1.9           | 2.0           | 2.3           | 1.6           |
| <i>range</i>                                                                    | 12 - 19       | 12 - 19       | 12 - 18       | 12 - 19       | 12 - 20       | 12 - 18       |
| <b>WAIS-III Full Scale IQ</b>                                                   |               |               |               |               |               |               |
| <i>mean</i>                                                                     | 110.3         | 110.1         | 110.5         | 111.6         | 111.2         | 112.0         |
| <i>standard deviation</i>                                                       | 15.0          | 14.2          | 16.0          | 16.3          | 19.3          | 13.1          |
| <i>range</i>                                                                    | 72 - 140      | 72 - 137      | 81 - 140      | 79 - 152      | 79 - 142      | 90 - 152      |
| <b>WMS-III IMI</b>                                                              |               |               |               |               |               |               |
| <i>mean</i>                                                                     | 109.7         | 114.4         | 104.7         | 111.9         | 114.8         | 109.0         |
| <i>standard deviation</i>                                                       | 16.6          | 18.3          | 13.4          | 16.9          | 16.4          | 17.4          |
| <i>range</i>                                                                    | 63 - 144      | 63 - 144      | 82 - 130      | 80 - 146      | 84 - 138      | 80 - 146      |
| <b>WMS-III DMI</b>                                                              |               |               |               |               |               |               |
| <i>mean</i>                                                                     | 112.6         | 116.7         | 108.3         | 111.8         | 113.5         | 110.1         |
| <i>standard deviation</i>                                                       | 17.3          | 20.4          | 12.5          | 16.0          | 14.9          | 17.2          |
| <i>range</i>                                                                    | 52 - 140      | 52 - 140      | 86 - 132      | 83 - 150      | 83 - 140      | 84 - 150      |
| <b>Duration of Heavy Drinking<sup>cdef</sup> (years)</b>                        |               |               |               |               |               |               |
| <i>mean</i>                                                                     | 17.4          | 14.3          | 20.5          | 0.0           | 0.0           | 0.0           |
| <i>standard deviation</i>                                                       | 7.7           | 5.2           | 8.5           | 0.0           | 0.0           | 0.0           |
| <i>range</i>                                                                    | 5.0 - 35.0    | 6.0 - 25.0    | 5.0 - 35.0    | 0.0 - 0.0     | 0.0 - 0.0     | 0.0 - 0.0     |
| <b>Quantity Frequency Index<sup>cde</sup> (ounces ethanol/day; ~drinks/day)</b> |               |               |               |               |               |               |
| <i>mean</i>                                                                     | 11.2          | 8.7           | 13.7          | 0.3           | 0.2           | 0.4           |
| <i>standard deviation</i>                                                       | 8.8           | 5.8           | 10.5          | 0.6           | 0.5           | 0.7           |
| <i>range</i>                                                                    | 2.7 - 38.4    | 2.7 - 28.1    | 4.5 - 38.4    | 0.0 - 2.6     | 0.0 - 2.4     | 0.0 - 2.6     |
| <b>Length of Sobriety<sup>cde</sup> (years)</b>                                 |               |               |               |               |               |               |
| <i>mean</i>                                                                     | 8.3           | 10.6          | 5.9           | 2.1           | 3.6           | 0.5           |
| <i>standard deviation</i>                                                       | 10.3          | 11.1          | 8.8           | 6.4           | 8.5           | 1.3           |

|                                                         |            |            |            |              |              |             |
|---------------------------------------------------------|------------|------------|------------|--------------|--------------|-------------|
| <i>range</i>                                            | 0.1 - 32.3 | 0.1 - 32.1 | 0.1 - 32.3 | 0.002 - 29.2 | 0.002 - 29.2 | 0.002 - 5.1 |
| <b>Penn Alcohol Craving Scale<sup>cde</sup></b>         |            |            |            |              |              |             |
| <i>mean</i>                                             | 3.8        | 3.8        | 3.9        | 1.2          | 1.1          | 1.3         |
| <i>standard deviation</i>                               | 4.4        | 5.1        | 3.8        | 2.0          | 2.2          | 1.8         |
| <i>range</i>                                            | 0 - 19     | 0 - 19     | 0 - 12     | 0 - 9        | 0 - 9        | 0 - 5       |
| <b>Hamilton Rating Scale for Depression<sup>g</sup></b> |            |            |            |              |              |             |
| <i>mean</i>                                             | 3.5        | 4.9        | 2.2        | 2.4          | 3.1          | 1.8         |
| <i>standard deviation</i>                               | 4.2        | 4.1        | 4.0        | 2.8          | 3.3          | 2.1         |
| <i>range</i>                                            | 0 - 18     | 0 - 17     | 0 - 18     | 0 - 12       | 0 - 12       | 0 - 8       |

401 **Table 1. Participant characteristics**

402 Participants Characteristics ( $p < 0.05$ ): <sup>a</sup>Control Women > Control Men; <sup>b</sup>Control Men > Alcoholic Men;  
 403 <sup>c</sup>Alcoholics > Controls; <sup>d</sup>Alcoholic Men > Control Men; <sup>e</sup>Alcoholic Women > Control Women; <sup>f</sup>Alcoholic Men >  
 404 Alcoholic Women; <sup>g</sup>Alcoholic Women > Alcoholic Men. See Results for additional details on number of  
 405 participants.

406 Abbreviations: WAIS = Wechsler Adult Intelligence Scale; WMS = Wechsler Memory Scale; IMI = Immediate  
 407 Memory Index; DMI = Delayed Memory Index. Five NCm and two NCw reported being lifetime abstainers, and  
 408 one NCw was unable to report an accurate length of sobriety.

409

410 The ALC and NC groups did not differ significantly by age. Although the NCw were  
 411 older than the NCm, controls did not differ significantly from their respective ALC counterparts  
 412 by age. ALCm had on average one year less education relative to NCm. Groups did not differ  
 413 significantly on WAIS-III Full Scale IQ scores. While ALCw had higher Hamilton Rating Scale  
 414 for Depression scores than AUDm, the average scores for all four subgroups (ALCm, ALCw,  
 415 NCm, and NCw) were low (all means below 5, whereas mild depression threshold is 8), so  
 416 depression likely contributed little to our observed gender differences.

417 By definition, the ALC group had longer durations of heavy drinking than the NC group.

418 The ALCm on average drank heavily for six years more than did the ALCw, and showed a trend

419 toward drinking larger average daily quantities (QFI,  $F_{1,40} = 3.66$ ,  $p = 0.06$ ). Five NCm and two  
420 NCw reported being lifetime abstainers (and as such did not have relevant length of sobriety  
421 values). The ALC group reported higher levels of craving for alcohol than the NC group on the  
422 PACS administered immediately prior to the scan; ALCm and ALCw did not differ on reported  
423 level of pre-scan alcohol craving. Eighty-one of the 84 participants were reached approximately  
424 two weeks after their scan date to be reassessed on alcohol craving level. One ALCw, one  
425 ALCm, and one NCw could not be reached for follow up assessment on PACS scores. Neither  
426 the ALC group nor the NC group displayed an increase in alcohol craving (*i.e.*, a significant  
427 change in PACS scores) from the assessment on their scan date to their follow up assessment.

428

### 429 *3.2 Behavioral Results*

430 Measures of participant performance on the face memory task were calculated for overall  
431 performance and for performance by each Distractor type and facial Emotion. Means, standard  
432 deviations, and ranges are reported for percent correct responses and reaction times in Table A1  
433 and Table A2, respectively.

434 A significant Group-by-Gender interaction was found for accuracy ( $F_{1,80} = 6.880$ ,  $p =$   
435  $0.01$ , Figure A1 and Table A1). The significant interaction indicated that the better performance  
436 for the ALCw than the ALCm was larger than the difference between NCw and NCm. Accuracy  
437 and reaction times did not vary significantly as a function of the Distractor, nor were there any  
438 significant interactions of Distractor with Group or Gender (all  $p > 0.05$ ). The main effect of  
439 Emotion was significant for percent correct responses, wherein ALC and NC participants alike  
440 performed better on both positive and negative faces relative to neutral faces. Performance on  
441 positive and negative faces did not differ significantly. The effect of Emotion on percent correct

442 responses did not vary as a function of Group or Gender (all  $p > 0.05$ ). Regarding reaction time  
443 and Emotion, participants responded more quickly to positive face trials relative to neutral face  
444 trials; this effect did not vary by Group nor by Gender. The main effect of Face Gender on  
445 percent correct responses also was significant ( $F_{1,80} = 6.80, p = 0.01$ ), with the overall  
446 performance being better for male than for female faces. The effects of Group and Gender on  
447 percent correct responses and reaction times for Face Gender were not significant (all  $p > 0.05$ ).

448

### 449 *3.3 fMRI BOLD Effects*

450 Effects of the distractors on the BOLD signal were assessed using group and intergroup  
451 cluster analyses for cerebral cortex, along with a-priori analyses of anatomical ROI that had been  
452 implicated by the literature. Below, we report group analyses of fixation contrasts and between-  
453 distractor conditions, followed by intergroup analyses of the same contrasts.

454

#### 455 **3.3.1 Cortical Cluster Analyses of Distractor Effects**

456 Analyses of task contrasts revealed broadly similar activation patterns for the ALCw,  
457 ALCm, NCw, and NCm groups. During fixation, regions involved in the DMN (the anatomical  
458 network described in the Introduction) were significantly more active than during the  
459 presentation of distractor images. We refer to those more active regions as fixation-regions. As  
460 detailed in the Methods, these regions were masked and examined separately for subsequent  
461 analyses of contrasts between distractor types. Identical analyses were then performed for the  
462 task-regions. Significant clusters for between-distractor contrasts can be seen for fixation-regions  
463 first (Figure 3 and Figure A3), and then for task-regions (Figure 4 and Figure A4).

464 All four groups had more brain activity (Table A3) in response to alcbev than scrambled  
465 distractors in the four main fixation-regions (the anterior and posterior medial hub regions, the  
466 temporal parietal junction, and the middle temporal gyrus), while the nonalcbev vs. scrambled  
467 contrast was less consistent. The alcbev vs. nonalcbev contrast generally indicated higher  
468 activation for the alcbev than nonalcbev. For task-regions, alcbev and nonalcbev elicited higher  
469 activation than scrambled in the occipital lobe and adjoining visual areas in temporal and parietal  
470 cortex (Table A3, Figure A4).

471

### 472 **3.3.2 Distractor Intergroup Cluster Analyses**

473 The pattern of results indicated that ALCw and NCm had strong activation contrasts  
474 (beverages > scrambled) in visual areas and the medial DMN regions, especially the posterior  
475 hub. The ALCw had greater activation contrast than NCw, while ALCm had lower activation  
476 contrast than NCm. Table 2 summarizes the regions where significant Group-by-Gender  
477 interactions were found for the distractor contrasts, i.e., for alcbev vs. nonalcbev, alcbev vs.  
478 scrambled, and nonalcbev vs. scrambled. Table A4 provides all significant Group-by-Gender  
479 interactions, and Figure 3, Figure 4, Figure A3, Figure A4 illustrate alcbev vs. scrambled  
480 contrasts. In total, we observed 22 clusters where the Group-by-Gender interaction was  
481 statistically significant: Seven in fixation-regions and 15 in task-regions.

482

483

| Fixation Masking | Distractor Contrast   | Clusters | Annotation (Hemisphere: Number of Clusters)                     |
|------------------|-----------------------|----------|-----------------------------------------------------------------|
| fixation-regions | alcbev > scrambled    | 4        | superior frontal (L: 1, R: 2), precuneus (R: 1)                 |
| fixation-regions | nonalcbev > scrambled | 3        | superior frontal (R: 2), caudal middle frontal (R: 1)           |
| task-regions     | alcbev > scrambled    | 5        | superior parietal (L: 1, R: 2), fusiform (R: 1), lingual (R: 1) |
| task-regions     | nonalcbev > scrambled | 4        | superior parietal (L: 1, R: 1), lateral occipital (R: 2)        |
| task-regions     | scrambled > nonalcbev | 4        | superior frontal (L: 2), rostral middle frontal (L: 2)          |
| task-regions     | nonalcbev > alcbev    | 2        | superior frontal (L: 2)                                         |

484 **Table 2. Group-by-gender cortical cluster summary**

485 Annotations (using the Desikan-Killiany atlas) are shown for each of the 22 clusters with significant Group-by-  
486 Gender interactions in distractor contrasts. The Fixation Masking column refers to the separate analyses conducted  
487 for fixation-regions and task-regions as shown in Figure 2. The clusters reported can be understood to span multiple  
488 functional regions [71]. That is, they are not limited to a single region, as reported by the maximal vertex or voxel.  
489 Abbreviations: alcbev = alcoholic beverages; nonalcbev = nonalcoholic beverages; L = left hemisphere; R = right  
490 hemisphere. See Table A4 for detailed cluster information. Note: for the fixation-regions, superior frontal and caudal  
491 middle frontal are part of the anterior hub; and precuneus is part of the posterior hub.

492

493 For the seven clusters in fixation-regions, six were in the anterior hub and one was in the  
494 posterior hub. For alcbev > scrambled, we observed one cluster in the posterior hub and three in  
495 the anterior hub. For three of these four clusters, ALCw and NCm had the strongest contrasts; in  
496 the fourth cluster, ALCw had the strongest contrast, whereas ALCm had the weakest. The  
497 remaining three clusters were found for nonalcbev > scrambled. As with the alcbev contrasts,  
498 ALCw and NCm had the strongest contrasts. All three clusters were in the right hemisphere of  
499 the anterior hub. Thus, the overall pattern consistent among the seven clusters was as follows:  
500 NCm had stronger contrast (beverage > scrambled) than ALCm, while muted or opposite  
501 direction comparison was observed for the women.



502 Of the 15 task-regions clusters, two were found for nonalcbev > alcbev (left superior  
503 frontal cortex). In both clusters, NCw had higher activation to nonalcoholic beverages, while  
504 NCm had higher activation to alcoholic beverages. In the other 13 clusters, the strongest  
505 contrasts were found for NCm and ALCw. Of those, the significant interactions were found in  
506 visual regions where nonalcbev > scrambled, while significant interactions in frontal regions  
507 were found for scrambled > nonalcbev.

508 Setting aside gender, analyses of activation levels comparing ALC and NC groups  
509 revealed 15 cortical clusters with significantly greater contrast levels for the ALC group than for  
510 the NC group (Table A5). Two of the clusters were in the DMN: one alcbev-region  
511 (temporoparietal junction), and one nonalcbev-region (posterior hub). The other 13, all alcbev-  
512 regions, were in task-regions located throughout the cortex: 7 frontal, 3 temporal, 2 parietal, and  
513 1 occipital.

514

### 515 **3.3.3 Distractor Region of Interest Analyses**

516 Results of ANOVAs examining between-subjects effects of Group and Gender and  
517 within-subjects effects of Distractor type on BOLD percent signal change within each ROI are  
518 summarized in Table 3. Reported means and standard deviations represent the percent signal  
519 change across each ROI (unmasked) for the time period of 2 to 12 seconds post-distractor  
520 stimulus onset. These anatomically-defined ROI included regions in EROS areas (Makris *et al.*,  
521 2008; Sawyer *et al.*, 2017), as well as in regions associated with face memory maintenance and  
522 distractor interference, as described in the Introduction and Methods.

523 Results from the ROI analyses of distractor effects indicated strong effects of distractor  
524 type on neural activation patterns. Specifically, among all participants, significantly higher

525 responses were observed in several regions (EROS, left DLPFC, left VLPFC, right OFC,  
526 bilateral parahippocampal gyrus, bilateral hippocampus, bilateral amygdala, and bilateral  
527 fusiform) to both alcbev and nonalcbev relative to scrambled stimuli. The effect was  
528 significantly larger for the ALC group than the NC group in the left EROS and left fusiform  
529 regions, and in four prefrontal brain areas (left DLPFC, left VLPFC, left OFC, and right OFC).  
530 Additionally, in the alcbev vs. nonalcbev contrast, the ALC group showed significantly higher  
531 responses than the NC group in the left OFC ROI. Figure 5 shows percent signal change over  
532 time for the OFC, VLPFC, fusiform, and ACC activation, to demonstrate representative activity  
533 patterns. The left OFC shows the heightened activation for alcbev for the ALC group, the  
534 fusiform and VLPFC show higher activation in both groups to both beverage types, and the ACC  
535 demonstrates how activation is lower during distractor presentation than during fixation (for both  
536 groups and for all three distractor types).

537         Applying a Bonferroni correction accounting for all 25 tests would set a critical value for  
538 statistical significance of main effects and Distractor, Group, and Gender interactions at  $p <$   
539 0.002. Using this threshold, main effects of Distractor would remain significant in left OFC,  
540 bilateral parahippocampal gyrus, bilateral hippocampus, right amygdala, and bilateral fusiform  
541 gyrus. All main effects of Group and Gender, as well as all interaction effects were  $p > 0.002$ .

542

|                    | ALCOHOLICS                           |                       |                   |                        | NONALCOHOLIC CONTROLS                |                       |                   |                        |                     |
|--------------------|--------------------------------------|-----------------------|-------------------|------------------------|--------------------------------------|-----------------------|-------------------|------------------------|---------------------|
|                    | Alcoholic Beverage                   | Nonalcoholic Beverage | Scrambled Picture | Distractor Main Effect | Alcoholic Beverage                   | Nonalcoholic Beverage | Scrambled Picture | Distractor Main Effect | Distractor by Group |
|                    | Percent Signal Change: Mean $\pm$ SD |                       |                   | $F_{1,41}$             | Percent Signal Change: Mean $\pm$ SD |                       |                   | $F_{1,41}$             | $F_{1,80}$          |
| EROS               | .073 $\pm$ .093                      | .059 $\pm$ .072       | .030 $\pm$ .068   | <b>8.795*ab</b>        | .047 $\pm$ .089                      | .051 $\pm$ .085       | .040 $\pm$ .063   | .407                   | 3.650 <sup>+</sup>  |
| EROS LH            | .071 $\pm$ .097                      | .058 $\pm$ .079       | .024 $\pm$ .071   | <b>10.567*ab</b>       | .049 $\pm$ .093                      | .055 $\pm$ .093       | .040 $\pm$ .066   | .580                   | <b>4.217*</b>       |
| EROS RH            | .075 $\pm$ .093                      | .061 $\pm$ .071       | .037 $\pm$ .069   | <b>7.003*a</b>         | .047 $\pm$ .089                      | .048 $\pm$ .081       | .041 $\pm$ .067   | .247                   | 3.034 <sup>+</sup>  |
| DLPFC LH           | .060 $\pm$ .111                      | .049 $\pm$ .103       | .017 $\pm$ .085   | <b>7.529*ab</b>        | .041 $\pm$ .098                      | .047 $\pm$ .096       | .040 $\pm$ .073   | .032                   | <b>4.481*</b>       |
| DLPFC RH           | .069 $\pm$ .111                      | .060 $\pm$ .094       | .039 $\pm$ .077   | 3.953 <sup>+</sup>     | .034 $\pm$ .097                      | .035 $\pm$ .093       | .039 $\pm$ .077   | .169                   | 3.382 <sup>+</sup>  |
| VLPFC LH           | .198 $\pm$ .132                      | .181 $\pm$ .147       | .145 $\pm$ .111   | <b>11.680*ab</b>       | .157 $\pm$ .115                      | .182 $\pm$ .129       | .154 $\pm$ .097   | .062                   | <b>5.820*</b>       |
| VLPFC RH           | .210 $\pm$ .122                      | .195 $\pm$ .134       | .173 $\pm$ .124   | <b>5.387*a</b>         | .157 $\pm$ .114                      | .174 $\pm$ .134       | .155 $\pm$ .104   | .039                   | 2.925 <sup>+</sup>  |
| OFC LH             | .125 $\pm$ .130                      | .090 $\pm$ .135       | .057 $\pm$ .107   | <b>16.019*ac</b>       | .071 $\pm$ .164                      | .085 $\pm$ .193       | .058 $\pm$ .157   | .399                   | <b>6.105*</b>       |
| OFC RH             | .256 $\pm$ .179                      | .234 $\pm$ .203       | .178 $\pm$ .210   | <b>10.130*ab</b>       | .184 $\pm$ .224                      | .195 $\pm$ .249       | .177 $\pm$ .199   | .176                   | <b>5.608*</b>       |
| Insula LH          | .104 $\pm$ .105                      | .096 $\pm$ .091       | .069 $\pm$ .077   | <b>5.920*a</b>         | .067 $\pm$ .088                      | .082 $\pm$ .080       | .066 $\pm$ .061   | .001                   | 3.275 <sup>+</sup>  |
| Insula RH          | .098 $\pm$ .097                      | .082 $\pm$ .091       | .068 $\pm$ .073   | <b>4.084*a</b>         | .061 $\pm$ .088                      | .068 $\pm$ .075       | .059 $\pm$ .066   | .025                   | 2.109               |
| Parahippocampal LH | .126 $\pm$ .149                      | .125 $\pm$ .098       | .052 $\pm$ .101   | <b>12.216*ab</b>       | .130 $\pm$ .136                      | .136 $\pm$ .141       | .083 $\pm$ .100   | <b>4.915*ab</b>        | 0.894               |
| Parahippocampal RH | .156 $\pm$ .140                      | .136 $\pm$ .093       | .083 $\pm$ .090   | <b>12.220*ab</b>       | .160 $\pm$ .119                      | .167 $\pm$ .126       | .109 $\pm$ .090   | <b>9.013*ab</b>        | 0.743               |
| Hippocampus LH     | .085 $\pm$ .131                      | .077 $\pm$ .096       | .021 $\pm$ .094   | <b>13.908*ab</b>       | .050 $\pm$ .108                      | .054 $\pm$ .105       | .012 $\pm$ .090   | <b>7.179*ab</b>        | 1.394               |
| Hippocampus RH     | .088 $\pm$ .120                      | .066 $\pm$ .083       | .024 $\pm$ .088   | <b>11.669*ab</b>       | .077 $\pm$ .106                      | .074 $\pm$ .088       | .038 $\pm$ .085   | <b>7.955*ab</b>        | 1.134               |
| Amygdala LH        | .093 $\pm$ .188                      | .098 $\pm$ .154       | .041 $\pm$ .154   | <b>6.019*ab</b>        | .094 $\pm$ .194                      | .095 $\pm$ .203       | .064 $\pm$ .137   | 2.207                  | 0.581               |
| Amygdala RH        | .105 $\pm$ .140                      | .089 $\pm$ .126       | .027 $\pm$ .134   | <b>14.976*ab</b>       | .121 $\pm$ .175                      | .118 $\pm$ .160       | .085 $\pm$ .130   | <b>4.389*a</b>         | 2.519               |
| ACC LH             | -.059 $\pm$ .119                     | -.080 $\pm$ .094      | -.095 $\pm$ .106  | <b>5.019*a</b>         | -.092 $\pm$ .109                     | -.088 $\pm$ .116      | -.089 $\pm$ .105  | .036                   | 3.195 <sup>+</sup>  |
| ACC RH             | -.056 $\pm$ .119                     | -.068 $\pm$ .102      | -.080 $\pm$ .111  | 2.026                  | -.085 $\pm$ .107                     | -.089 $\pm$ .100      | -.085 $\pm$ .097  | 0.000                  | 1.179               |
| Fusiform LH        | .758 $\pm$ .258                      | .743 $\pm$ .207       | .553 $\pm$ .120   | <b>65.492*ab</b>       | .705 $\pm$ .285                      | .724 $\pm$ .294       | .579 $\pm$ .259   | <b>22.579*ab</b>       | <b>4.803*</b>       |
| Fusiform RH        | .855 $\pm$ .303                      | .851 $\pm$ .234       | .669 $\pm$ .229   | <b>49.514*ab</b>       | .823 $\pm$ .292                      | .845 $\pm$ .301       | .694 $\pm$ .253   | <b>49.438*ab</b>       | 3.322 <sup>+</sup>  |

543 **Table 3. Percent signal change for each distractor type by group, for a-priori regions**

544 Distractor by Group F-values are reported from a full factorial ANOVA model with between-groups factors of  
 545 Group and Gender and within-groups factor of Distractor type. Distractor main effect F-values within each group are  
 546 reported from ANOVA model including within-subjects factor of Distractor type. Abbreviations: EROS = Extended  
 547 Reward and Oversight System; DLPFC = Dorsolateral Prefrontal Cortex; VLPFC = Ventrolateral Prefrontal Cortex;  
 548 OFC = Orbitofrontal Cortex; ACC = Anterior Cingulate Cortex; LH = Left Hemisphere; RH = Right Hemisphere

549 a. Alcoholic Beverage > Scrambled Picture,  $p < .05$

550 b. Nonalcoholic Beverage > Scrambled Picture,  $p < .05$

551 c. Alcoholic Beverage > Nonalcoholic Beverage,  $p < .05$

552 \* $p < .05$

553 +.05 <  $p < .10$

554

## 555 **4. Discussion**

### 556 *4.1 Behavioral Responses to Probe Face and Distractor Cues*

557 In this study, ALC and NC participants alike were able to use emotional face valence  
558 information to improve face memory, as assessed by a DMTS task (LeDoux, 1996; Dolcos *et al.*,  
559 2005; Dolcos & McCarthy, 2006). This was evidenced by better memory performance (*i.e.*,  
560 higher accuracy) on positive and negative faces, and faster reaction times to positive faces, than  
561 neutral faces. Because it has been shown that alcoholism is associated with impaired emotional  
562 perception, and specifically impaired emotional face decoding (Oscar-Berman *et al.*, 1990;  
563 Philippot *et al.*, 1999; Clark *et al.*, 2007; Marinkovic *et al.*, 2009; Hoffman *et al.*, 2019; Lewis *et*  
564 *al.*, 2019), we had postulated that normal enhancement of memory by emotional content (in this  
565 case, emotional facial expressions) would not be as strong in the ALC group. In those studies,  
566 the ALC groups were mostly or exclusively men. However, our results suggest that the ability to  
567 use emotional information to aid face memory implicitly may be relatively preserved in AUDw.  
568 A significant Group-by-Gender interaction was observed on recognition accuracy as shown in  
569 Figure A1 and Table A1. Although the Group-by-Gender interaction for reaction times was not  
570 significant (Figure A2 and Table A2), the pattern is congruent with the accuracy data. The higher  
571 accuracy of the ALCw (~6 percentage points better than ALCm or NCw) may reflect their  
572 greater focus and sensitivity to emotional faces and resistance to distraction or underlying  
573 differences in personality or motivation (Mosher Ruiz *et al.*, 2017).

574 We had postulated that the ALC group would show more recognition errors after alcohol  
575 distractors (relative to other distractor types), whereas the NC group would not. However, we  
576 found that regardless of the group, the distractor type did not substantially influence accuracy or  
577 reaction time. Although we also had expected performance by the ALC group to be impaired by

578 alcoholic beverage cues, a significant interaction between group and distractor type was not  
579 evident. We did not find an attentional bias effect: The alcoholic beverage distractors (relative to  
580 nonalcoholic beverage or scrambled picture distractors) did not disproportionately decrease the  
581 number of correctly recalled faces among either the ALC or the NC groups. A review by Field  
582 and Cox (2008) suggested that the strength of the bias among ALC groups depends on drinking  
583 history. Interestingly, Loeber and colleagues (2009) found that reduced attentional biasing to  
584 alcohol cues was associated with longer durations of heavy drinking, and our sample also had  
585 long durations. Combining participants with variable drinking histories might have masked the  
586 attentional biasing effect. However, measures of neural activity may be more sensitive than  
587 behavioral measures to changes associated with long-term heavy drinking.

588

#### 589 *4.2 Distractor fMRI Contrasts*

590 The fMRI contrasts revealed broadly similar patterns of brain activity among the four  
591 groups, for both fixation-regions and task-regions. In both brain networks, the beverages (alcbev  
592 and nonalcbev) elicited higher activation than the scrambled distractors. This amounts to internal  
593 replications of our present fMRI results, with four independent samples (ALCm, ALCw, NCm,  
594 and NCw) revealing the same fixation-regions, same task-regions, and with mostly the same  
595 direction of effects for task contrasts within those regions. The results reflect the existence,  
596 location, and extent of the DMN (Buckner & DiNicola, 2019; Uddin *et al.*, 2019), and also  
597 indicate that beverage pictures elicit higher activation than scrambled pictures in the DMN.  
598 Moreover, our results indicate that DMN regions are sensitive to the informational content of  
599 visual stimuli. In task-regions, the occipital lobe, along with adjoining visual areas in temporal  
600 and parietal cortex, were clearly more activated by beverage stimuli than by scrambled images.

601 The results further suggest that content processing is not solely performed by those visual  
602 regions, because activation to beverage cues was identified in middle to posterior cingulate  
603 regions, which are involved in a multitude of cognitive functions (Heilbronner & Hayden, 2016;  
604 Yeo *et al.*, 2016).

605

### 606 *4.3 Gender Differences*

607 The present research provides further evidence for the importance of considering gender  
608 when exploring effects of alcoholism on the brain (Mann *et al.*, 2005; Ruiz *et al.*, 2013). Many  
609 factors contribute to the observed differences in function for abnormalities identified comparing  
610 ALCm with NCm vs ALCw with NCw.

611 Cortical group-level cluster analyses revealed significant Group-by-Gender interaction  
612 effects in 22 clusters. The general pattern of those findings indicated that ALCm had lower  
613 activation contrasts than NCm, while ALCw had higher activation contrasts than NCw. This  
614 pattern was observed primarily in contrasts between beverage and scrambled distractor  
615 conditions, and they were found in the two core medial DMN regions, as well as in visual  
616 association cortices. A similar pattern of results was found in a previous report (Sawyer *et al.*,  
617 2019) in which emotional vs. neutral image contrasts were lower in ALCm than NCm, and  
618 stronger in ALCw than NCw. The lower brain reactivity for ALCm, and higher for ALCw,  
619 highlighted gender effects, suggesting possible differences in the underlying basis for  
620 development of AUD. Of note, the results from other modalities also have indicated similar  
621 directions of the fMRI effects, with ALCw having larger reward regions than NCw, and higher  
622 fractional anisotropy than NCw, as compared to the smaller regions and lower fractional  
623 anisotropy found for ALCm than NCm (Sawyer *et al.*, 2017, 2018).

624           The gender-divergent abnormalities in the anterior and posterior hub regions of the DMN  
625 could be reflective of other gender differences observed in conjunction with AUD. The role of  
626 these regions in internal monitoring could relate to differences in pre-existing risk factors (Ruiz  
627 & Oscar-Berman, 2015; Brighton *et al.*, 2016; Mosher Ruiz *et al.*, 2017), or could represent  
628 differential consequences of alcohol abuse (Merrill & Read, 2010). A similar pattern of group  
629 differences was identified in cortical regions associated with visual processing. That is, the  
630 results could represent a more fundamental impact that is not regionally-specific. In the present  
631 study, effects of both increased activation in reward regions and decreased deactivation in DMN  
632 regions in response to alcohol pictures were strongest among ALCw in particular. One reason  
633 stronger alcohol cue-specific responses were observed among ALCw could be related to gender-  
634 based differences in physiological responses to alcohol cues (Rubio *et al.*, 2013). Aligned with  
635 this, larger responses to alcohol cues by female social drinkers relative to male social drinkers  
636 have been reported in superior and middle frontal gyri (Seo *et al.*, 2011).

637           Another explanation for greater effects of alcohol cues among women than men could be  
638 related to depression (Saraceno *et al.*, 2012). Symptoms of depression among non-treatment  
639 seeking heavy drinkers were reported to be correlated with increased activation in response to  
640 alcohol cue exposure in the insula, cingulate, ventral tegmentum, striatum, and thalamus  
641 (Feldstein Ewing *et al.*, 2010). Because ALCw tend to experience depression and anxiety  
642 symptoms (Benishek *et al.*, 1992; Schulte *et al.*, 2009), we expected to see higher responses to  
643 alcohol cues among ALCw than ALCm in these regions. Indeed, in our sample, ALCw had  
644 higher Hamilton Rating Scale for Depression scores than did ALCm, although the scores for men  
645 and women were low.

646

#### 647 4.4 Group Differences

648 In addition to significant gender interactions, we identified regions with differences  
649 between the ALC and NC groups. For the simple comparisons of the ALC group with the NC  
650 group, cluster analyses showed that the ALC group had higher activation in 2 fixation-regions  
651 and 13 task-regions (Table A5). Differences in the posterior hub were identified in regions with  
652 stronger activation to nonalcoholic beverages than to scrambled images, while the other clusters  
653 had stronger activation to alcoholic beverages. The higher contrasts observed for the ALC group  
654 indicate a processing bias toward beverage cues across fixation- and task-regions. Further, the  
655 fact that this cue-sensitivity is not isolated to a single region in the brain likely reflects a  
656 widespread divergence in emotional and cognitive activity.

657

#### 658 4.5 Brain Responsivity in Fixation-Regions (Default Network)

659 Compared to the NC group, cluster analyses showed that the ALC group, and the ALCw  
660 in particular, had stronger contrasts in the anterior and posterior hubs, along with the  
661 temporoparietal junction. The results for ROI that include DMN regions also support the finding  
662 of contrast dampening in response to alcohol cues. Abnormal DMN functioning has been  
663 observed in other addictions and neuropsychiatric conditions (Broyd *et al.*, 2009; Bednarski *et*  
664 *al.*, 2011; Zhou *et al.*, 2020). In AUD, abnormal functional connectivity among DMN regions  
665 has been reported (Chanraud *et al.*, 2011). ALCw in particular had stronger contrasts for both the  
666 anterior and posterior hubs, an abnormality which could indicate a limitation in the level of detail  
667 processed, or the way in which it is integrated (Sormaz *et al.*, 2018). Lower activation of the  
668 anterior hub specifically has been associated with dynamic attention allocation during task  
669 executions (Koshino *et al.*, 2011), suggesting that reduced deactivation of this region during



670 viewing of alcoholic beverage pictures among alcoholics could be associated with failure to  
671 reallocate attention back to the task when the alcohol distractors were presented.

672

#### 673 *4.6 Brain Responsivity in Regions of Interest*

674 The ROI analysis of the OFC provides evidence for reward-specific processing in the  
675 ALC group. In particular, reward-specific processing refers to their higher activation from the  
676 contrast between alcbev and nonalcbev. Several studies have reported enhanced OFC activation  
677 to alcohol cues (Wrase *et al.*, 2002; Myrick *et al.*, 2008; Ray *et al.*, 2010; Shields & Gremel,  
678 2020), and research has established the role of the OFC in alcohol and drug addiction more  
679 generally (Goldstein & Volkow, 2002). The OFC activity may be particularly important for  
680 preoccupation and anticipation stages of the addiction cycle (Koob & Volkow, 2010).

681 Additionally, activity in this region has been shown to correlate with subjective craving ratings  
682 of viewed alcohol cues (Myrick *et al.*, 2004), and further correlated with relapse risk (Reinhard  
683 *et al.*, 2015).

684 In many ROI, differences in activation levels among beverage distractor conditions  
685 (alcoholic and nonalcoholic) were larger relative to scrambled pictures in the ALC group than in  
686 the NC group. The higher responsivity of the ALC group to alcoholic beverages supports our  
687 hypothesis of greater attentional bias in the form of stronger alcbev vs. nonalcbev activity  
688 contrasts, but we did not expect the ALC group to have greater activation than the NC group to  
689 nonalcoholic beverages relative to scrambled cues. One explanation for this result is that many of  
690 the nonalcoholic beverages contain caffeine or sugar (*e.g.*, coffee, tea, soda), which, like  
691 alcoholic beverages, also stimulate reward-network activity (Garber & Lustig, 2011). As was  
692 suggested in an earlier meta-analysis (Field *et al.*, 2009), the attentional bias for caffeine-related

693 cues may correlate more strongly with subjective craving than for alcohol-related cues.

694 Moreover, craving for both caffeine and alcohol utilize similar neural circuits as are used for  
695 processing alcohol reward (Kunz *et al.*, 2008), as do the effects of sugar-related reward (Avena  
696 *et al.*, 2008; Volkow *et al.*, 2013).

697 The regions that responded more to beverage cues relative to the scrambled pictures were  
698 the total EROS and many of its subcomponents (DLPFC, VLPFC, OFC, parahippocampal gyrus,  
699 hippocampus, amygdala) and fusiform. In all of the regions where an interaction of Distractor  
700 type and Group was identified, the distractor effect was found to be significant among the ALC  
701 group, but not among controls. In the EROS, DLPFC, VLPFC, and OFC, the distractor effect in  
702 the ALC group was driven by greater activity during both alcoholic and nonalcoholic beverage  
703 pictures relative to scrambled pictures. In the OFC, however, the alcohol distractors elicited more  
704 activity in the ALC group than did the nonalcoholic beverages or the scrambled pictures. Thus,  
705 the strongest ROI effect specific to processing alcohol cues was observed in the OFC. Crucially,  
706 this effect was observed only in the ALC group and not in the NC group (*i.e.*, for controls, no  
707 ROI were identified where alcohol distractor pictures elicited more activity than did nonalcoholic  
708 beverages; see Table 3). The OFC is believed to play a major role in craving and reward function  
709 (Koob & Volkow, 2010).

710 Responses to alcohol and nonalcoholic beverage pictures in the fusiform gyrus were  
711 strong among the ALC and NC groups (Figure 5D), as expected, given the fusiform's role in  
712 visual object recognition (Pourtois *et al.*, 2009). We hypothesized further that the ALC group's  
713 decreased BOLD signal in the fusiform gyrus in response to alcohol cues would provide  
714 evidence for stronger distractor interference with face memory maintenance. However, our  
715 results showed that any diminishment of the BOLD signal in the fusiform was far outweighed by

716 its initially higher responses to the alcohol cues. While reductions in fusiform response across  
717 the time window of distractor analysis are apparent in the activation time course, an alcohol-  
718 specific decrement in the ALC group was not clear. The fact that BOLD responses in the  
719 fusiform ROI were consistently lower for scrambled pictures relative to alcohol and nonalcoholic  
720 beverage pictures in both the ALC and NC groups suggests that the differences in visual  
721 processing demands between conditions may have overridden any potential reduction in the  
722 BOLD signal as a result of distractor interference.

723 We hypothesized that a failure to inhibit distractor interference in response to alcohol  
724 cues would be associated with lower activity in VLPFC, given this region's role in inhibition of  
725 task-irrelevant distracting stimuli (Thompson-Schill *et al.*, 2002; Aron *et al.*, 2004). However,  
726 our ROI results showed similarly increased activation of this region for both alcohol and  
727 nonalcoholic beverage cues relative to scrambled pictures. This finding suggests that rather than  
728 a failure of VLPFC to inhibit distracting stimuli, the higher activity in this region might result  
729 from the overriding demand of emotional and reward salience of the alcohol cues. Alternatively,  
730 the VLPFC could be involved in inhibition regardless of the distractor type employed during the  
731 DMTS delay.

732

#### 733 *4.7 Limitations*

734 It is not clear to what degree the abnormalities we observed result from or predate heavy  
735 drinking. The mean abstinence period for the ALC group was 8.3 years, and since the NC group  
736 did not have an 'abstinence period,' we could not covary for sobriety. Still, our AUD cohort had  
737 drinking history values representative of the national population (World Health Organization,  
738 2019), which thereby improves the generalizability of our results. Sobriety in our subject cohort

739 points to how persistent the processing deficits in AUD populations are, and how short- and  
740 long-term abstinence may have different paths of recovery for men and women (Fama *et al.*,  
741 2020). Nonetheless, our findings illustrate how critical it is to pursue research examining gender  
742 differences regarding attentional bias towards reward-related stimuli and pathological alcohol  
743 consumption.

744 In conjunction with the multiple-comparison cluster correction procedures employed, the  
745 significance level we used ( $p < .05$ ) has been shown to have higher false-positive rates than  
746 expected (Eklund *et al.*, 2016). However, stricter thresholds would increase the chance of false-  
747 negative errors, and the significance level we used allows the size of the gender effects to be  
748 highlighted. Although we report cluster labels by the location of the peak voxel or vertex, the  
749 clusters reported can be understood to span multiple functional regions (Woo *et al.*, 2014). That  
750 is, they are not limited to a single region, as reported by the maximal vertex or voxel.

751 Finally, our analyses did not include factors such as cigarette smoking, body mass index,  
752 and hormone therapy (Luhar *et al.*, 2013; Oscar-Berman *et al.*, 2014), which could possibly  
753 influence alcohol cue processing, reward, and DMN activity.

754

## 755 **5. Conclusions**

756 Compared to the NC group, the ALC group had stronger activation for DMN regions, and  
757 overactivated reward regions during alcohol cue distraction. This suggests that attentional  
758 capture is not limited to reward regions, but also includes DMN regions. If so, the DMN has a  
759 role in processing salient aspects of addictive substances.

760 The present study showed that alcohol cue distractors have powerful effects on reward-  
761 related regions of the brain, even in the absence of impaired performance when alcohol cues are

762 employed as distracting stimuli. We also demonstrated that the increased responses in reward  
763 regions are accompanied by dampened DMN activity during the presentation of alcohol cues.  
764 Our results suggest that these effects are strongest among ALCw, and provide evidence for  
765 dimorphic patterns of responses to alcohol cues between ALCm and ALCw.

766

## 767 **Acknowledgements**

768 This work was supported by funds from the US Department of Veterans Affairs Clinical  
769 Science Research and Development grant I01CX000326; National Institute on Alcohol Abuse  
770 and Alcoholism (NIAAA) of the National Institutes of Health US Department of Health and  
771 Human Services under Award Numbers R01AA007112, R01AA016624, K05AA00219, and  
772 K01AA13402; and shared instrumentation grants 1S10RR023401, 1S10RR019307, and  
773 1S10RR023043 from the National Center for Research Resources (now National Center for  
774 Advancing Translational Sciences) at the Athinoula A. Martinos Center, Massachusetts General  
775 Hospital. Alcoholic and nonalcoholic beverage pictures were a combination of images used with  
776 permission from the Normative Appetitive Picture System (NAPS) (Stritzke et al., 2004), and  
777 other previously published works on alcohol cues (Wrase et al., 2002; Myrick et al., 2004). The  
778 authors thank Elinor Artsy, Sheeva Azma, Anne-Mette Guldborg, Zoe Gravitz, Doug Greve,  
779 Steve Lehar, Diane Merritt, Alan Poey, Elizabeth Rickenbacher, Trinity Urban, Maria Valmas,  
780 and Robert Zondervan for assistance with consultation, manuscript preparation and recruitment,  
781 assessment, preparing testing materials, and neuroimaging of the research participants. Finally,  
782 we would like to acknowledge the role of the research participants for making this study  
783 possible. The content is solely the responsibility of the authors and does not necessarily represent

784 the official views of the National Institutes of Health, the U.S. Department of Veterans Affairs,  
785 or the United States Government.

786

## 787 **Figures**

788

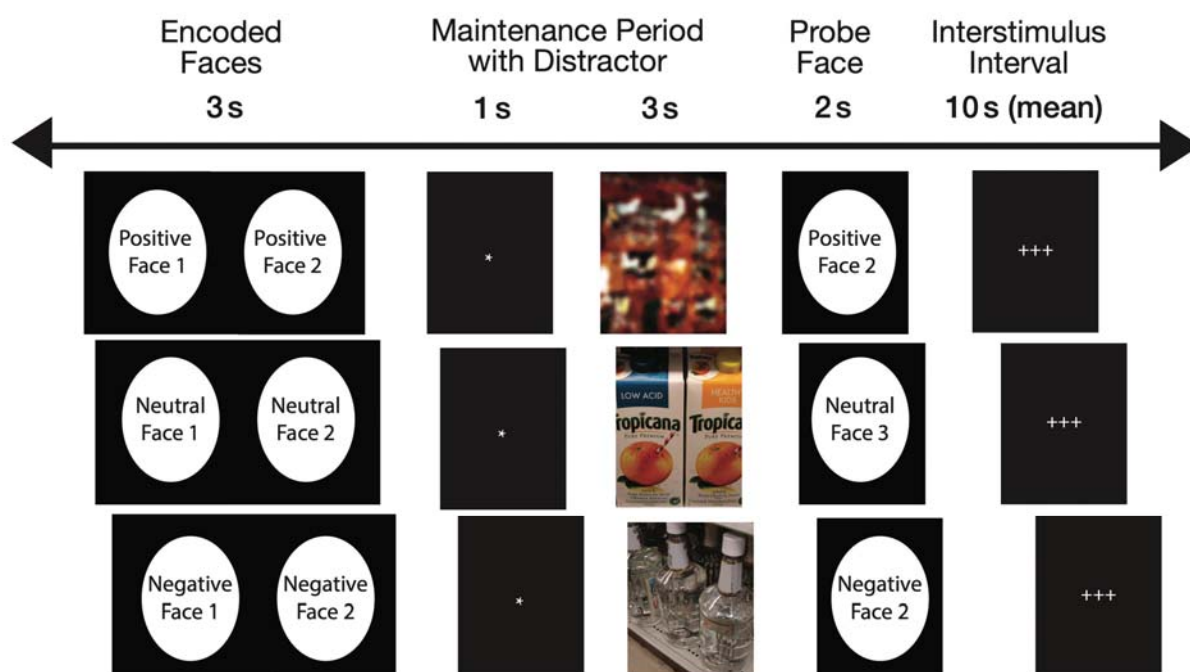

789

### 790 **Figure 1. Task presented during functional neuroimaging**

791 Two faces were presented simultaneously for three seconds, followed by an asterisk, a  
792 distractor was presented for three seconds. The probe face immediately followed, during which the subjects had  
793 been trained to respond with a button press with either their index or middle finger to indicate whether the probe  
794 face matched the encoded face. Three crosses served as the inter-trial interval, which lasted from 2 to 30 seconds  
795 (mean 10 seconds). A total of 162 trials were presented. While the faces in this figure have been blurred to mask the  
796 identities of the individuals, the research participants saw the original unblurred photographs.

797

## A. Fixation Masking

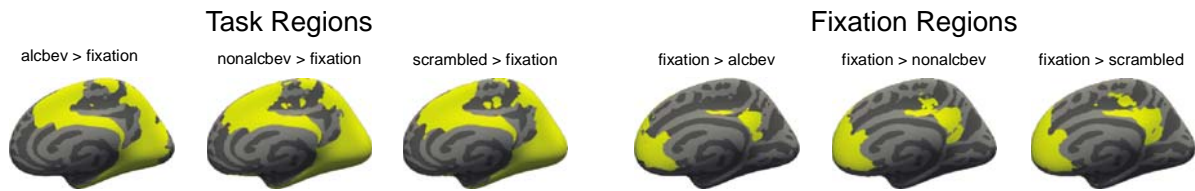

## B. Distractor Masking

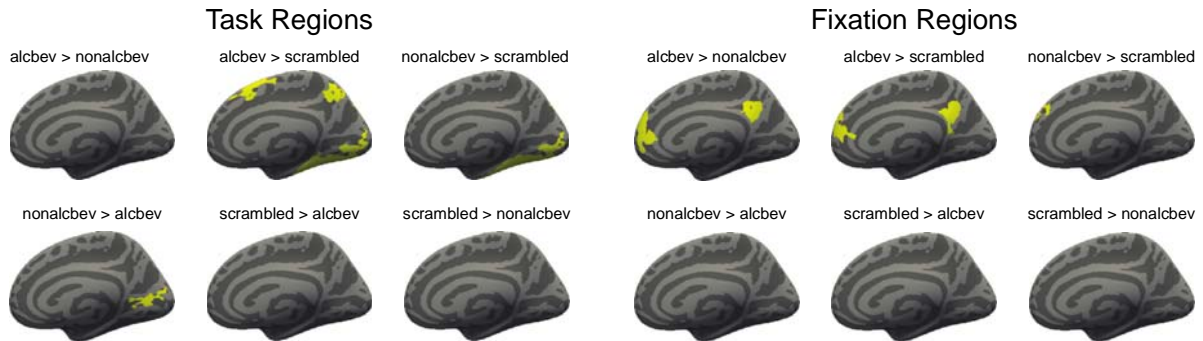

798

## 799 **Figure 2. Analyses conducted with masked fMRI data for cortex**

800 The top set of brains represents analyses conducted for cortical regions in which network masking (for task and  
801 fixation-regions) were performed. The bottom set of brains represents analyses conducted for cortical regions in  
802 which distractor masking (for task and fixation-regions) were performed.

803

804

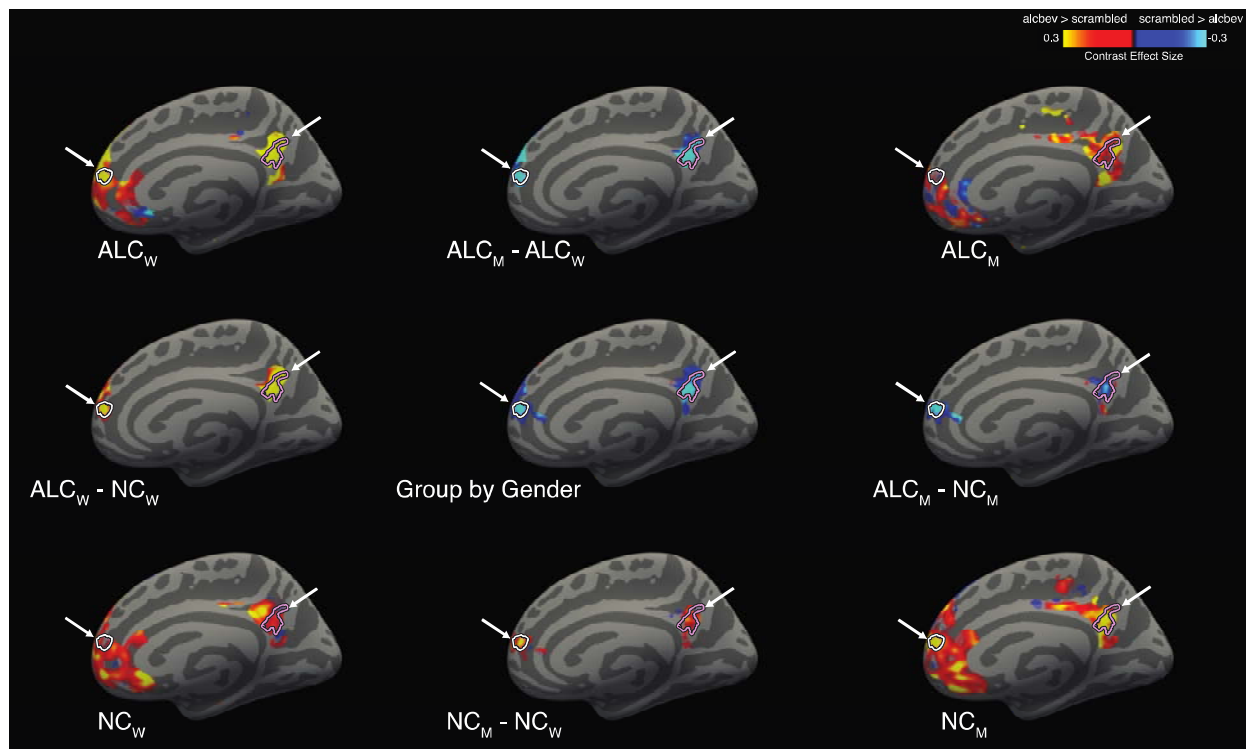

805  
806 **Figure 3. Cortical clusters significant for Group-by-Gender interactions for the alcbev vs.**

807 **scrambled contrast within fixation-regions (right medial view)**

808 A significant Group-by-Gender interaction revealed several clusters (see Table A4), two of which are indicated by  
809 arrows on the medial surface of the right hemisphere, with cluster outlines overlaid on contrast values between  
810 alcbev and scrambled distractors. Group mean contrast values (for alcbev vs. scrambled within fixation-regions) are  
811 displayed in the four brain images located in the corners of the figure, and group comparisons are indicated by  
812 minus signs. Abbreviations: ALC<sub>m</sub> = Alcoholic men; ALC<sub>w</sub> = Alcoholic women; NC<sub>m</sub> = Nonalcoholic men; NC<sub>w</sub>  
813 = Nonalcoholic women.

814

815

816

817

818



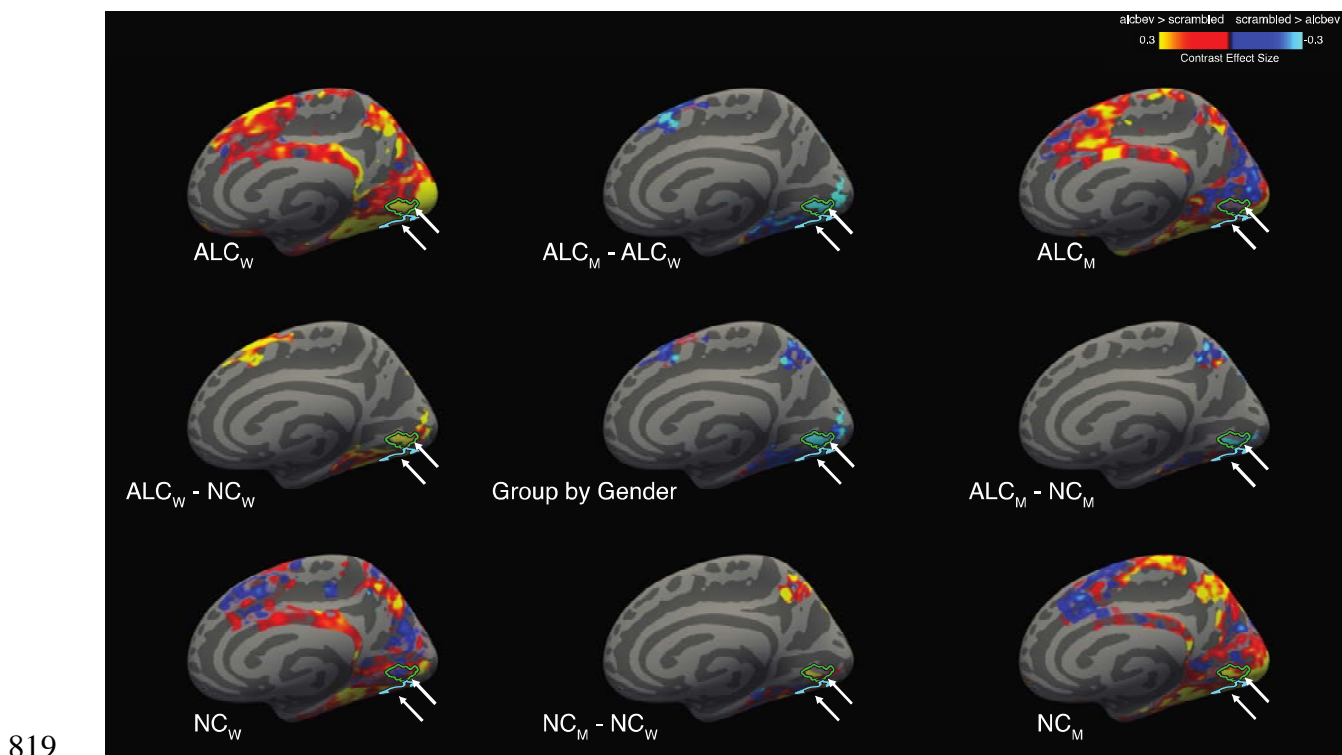

820 **Figure 4. Cortical clusters significant for Group-by-Gender interactions, for the alcbev vs.**  
821 **scrambled contrast within task-regions (right medial view)**

822 A significant Group-by-Gender interaction revealed several clusters (see Table A4), two of which are indicated by  
823 arrows on the medial surface of the right hemisphere, with cluster outlines overlaid on contrast values between  
824 alcbev and scrambled distractors. Group mean contrast values (for alcbev vs. scrambled within task-regions) are  
825 displayed in the four brain images located in the corners of the figure, and group comparisons are indicated by  
826 minus signs. Abbreviations: ALC<sub>M</sub> = Alcoholic men; ALC<sub>W</sub> = Alcoholic women; NC<sub>M</sub> = Nonalcoholic men; NC<sub>W</sub>  
827 = Nonalcoholic women.

828

829

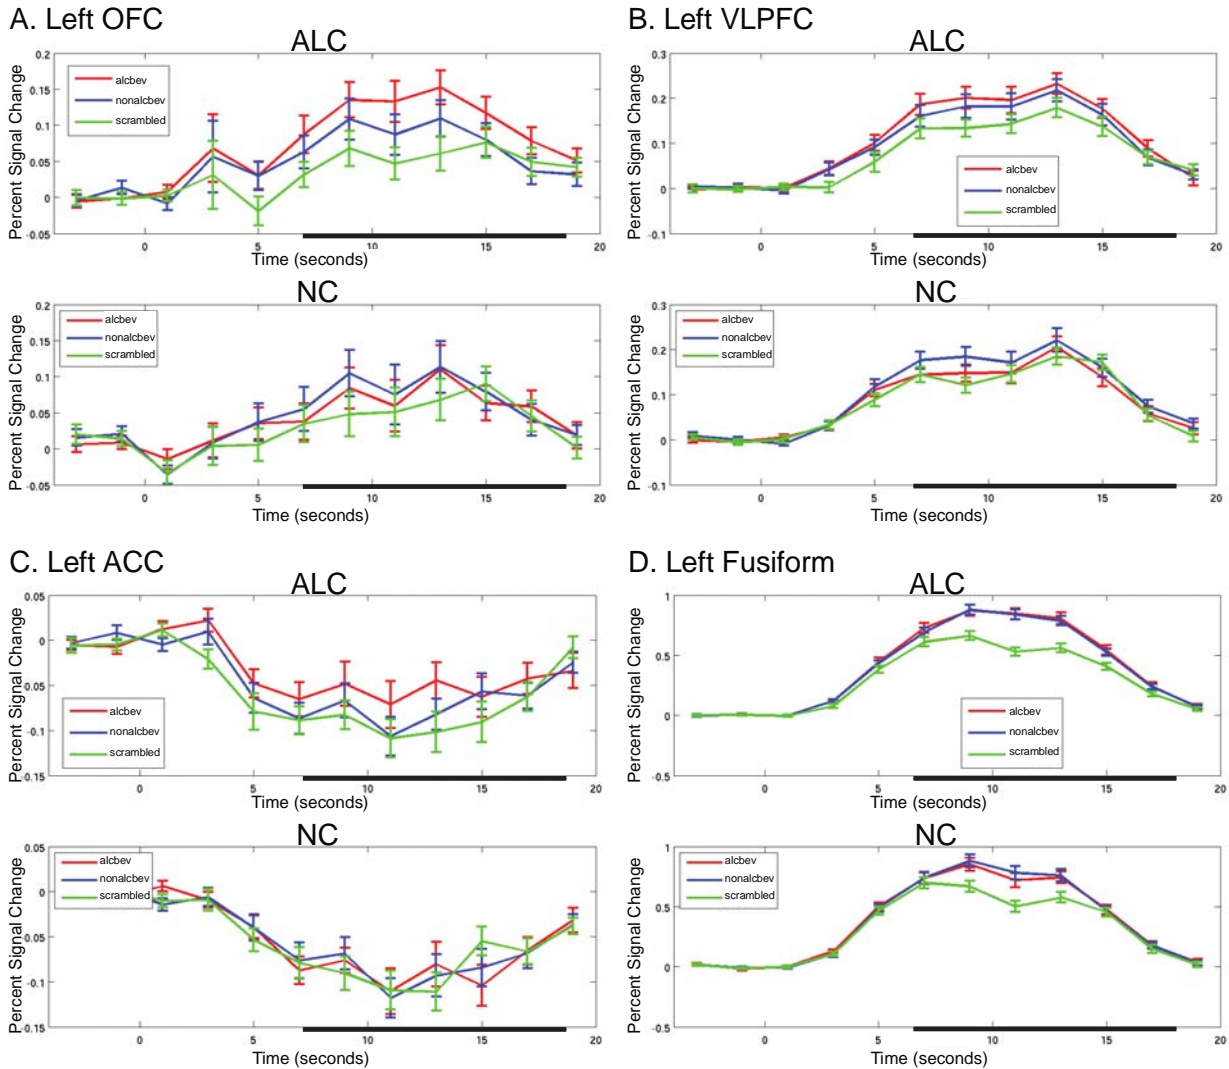

830

831 **Figure 5. ROI - Percent signal changes in regions of interest for ALC and NC participants**

832 **by distractor type**

833 The percent signal change represents brain activity during presentation of fixation and the task stimuli. Error bars  
834 represent the standard error of the mean. Time zero was set to the onset of the encoded faces, and signal zero was set  
835 to the average signal for the three initial time points (two pre-trial and one post-trial onset). The analysis window  
836 used to examine the distractor was 6 to 16 seconds following trial onset (2 to 12 seconds after distractor onset), as  
837 indicated by the thick line on the x axis. Abbreviations: OFC = orbitofrontal cortex; VLPFC = ventrolateral  
838 prefrontal cortex; ACC = anterior cingulate cortex. The ACC (Panel C) is part of the anterior hub within the  
839 fixation-regions. The remaining areas are primarily task-regions.

840 **Appendix**

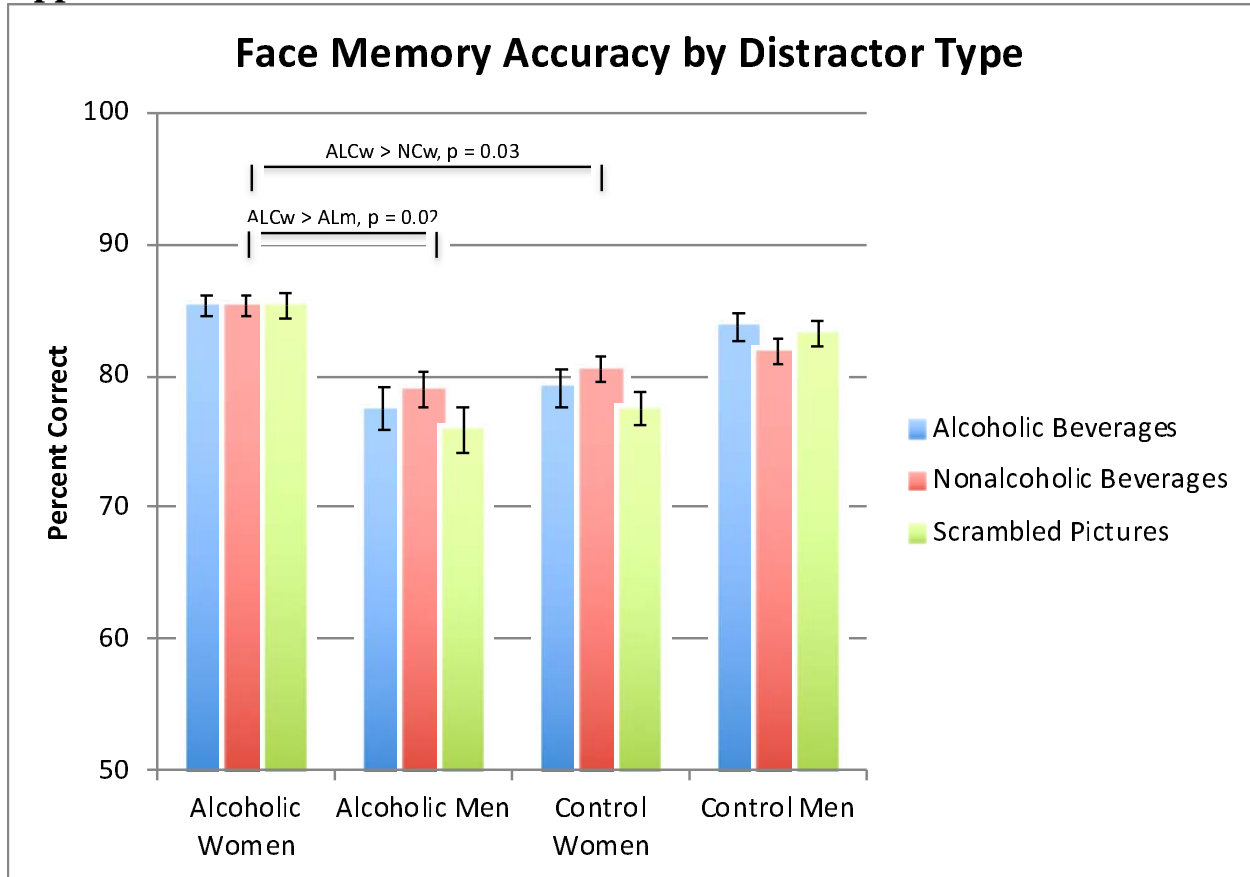

841

842 **Figure A1. Group and gender comparisons in percent correct responses to the probe face**

843 A significant Group-by-Gender interaction showed that face memory accuracy was significantly higher for the  
844 Alcoholic Women than the Alcoholic Men, a gender difference that was greater than the one observed for the NC  
845 group. Alcoholic Women also had higher accuracy than Control Women. (Also see Table A1.) There was no  
846 significant effect of Distractor type on performance accuracy. Error bars represent standard error of the mean.

847

848

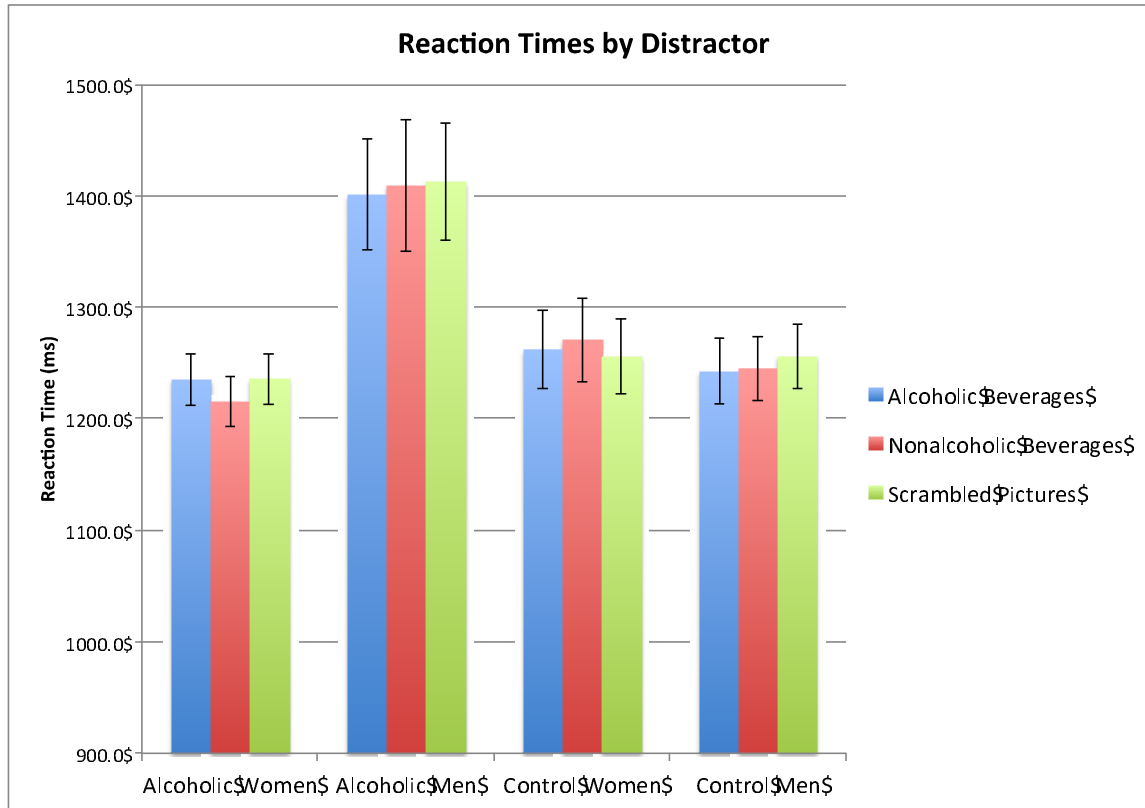

849

850 **Figure A2. Face memory reaction times: group and gender comparisons in reaction times**  
851 **to the probe face as a function of the distractor stimuli**

852 Reaction times (in milliseconds) are shown for correct trials sorted by conditions and groups. (Also see Table A2.)  
853 Participants did not vary significantly by Group or Gender on overall reaction times. There was no significant effect  
854 of Distractor type on reaction time, nor did reaction time performance by Distractor type significantly vary by Group  
855 or Gender. Error bars represent standard error of the mean.  
856

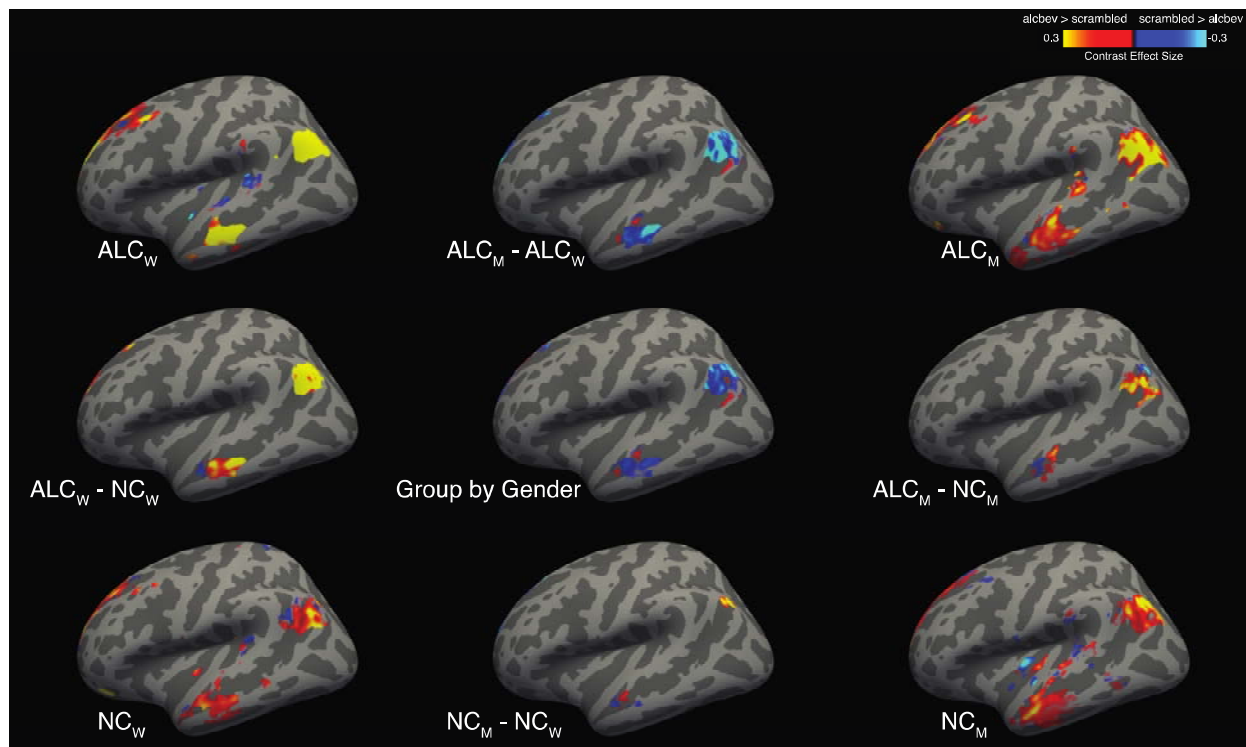

857  
858 **Figure A3. Cortical activation maps for the alcbev vs. scrambled contrast within fixation-**  
859 **regions (left lateral view)**  
860 A significant Group-by-Gender interaction revealed several clusters (see Figure 3 and Table A4), although no  
861 clusters with significant interactions were found on the left lateral surface. Group mean contrast values (for alcbev  
862 vs. scrambled within fixation-regions) are displayed in the four brain images located in the corners of the figure, and  
863 group comparisons are indicated by minus signs. Abbreviations: ALC<sub>M</sub> = Alcoholic men; ALC<sub>W</sub> = Alcoholic  
864 women; NC<sub>M</sub> = Nonalcoholic men; NC<sub>W</sub> = Nonalcoholic women.  
865

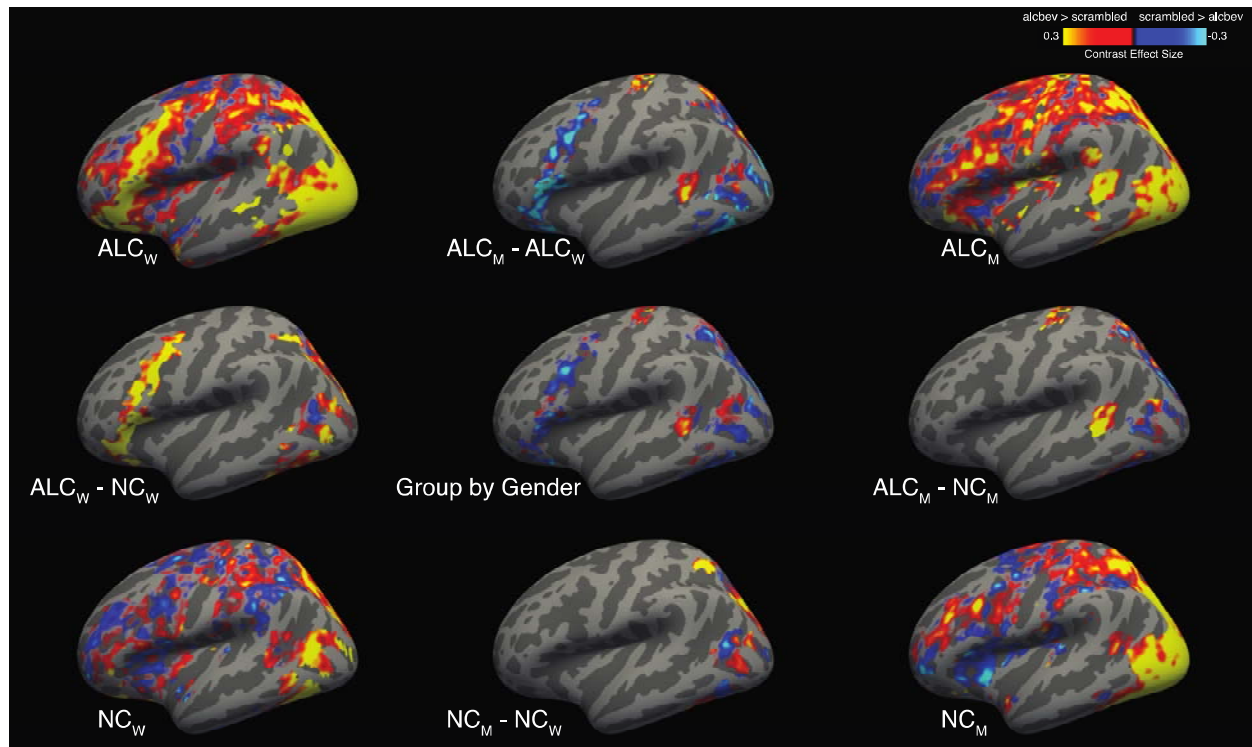

866  
867  
868  
869  
870  
871  
872  
873  
874  
875

**Figure A4. Cortical activation maps for the alcbev vs. scrambled contrast within task-regions (left lateral view)**

A significant Group-by-Gender interaction revealed several clusters (see Figure 4 and Table A4), although none are visible on the left lateral view. Group mean contrast values (for alcbev vs. scrambled within fixation-regions) are displayed in the four brain images located in the corners of the figure, and group comparisons are indicated by minus signs. Abbreviations:  $ALC_m$  = Alcoholic men;  $ALC_w$  = Alcoholic women;  $NC_m$  = Nonalcoholic men;  $NC_w$  = Nonalcoholic women.

876

|                           | Percent Correct Responses Overall <sup>abc</sup>           |            |           |           |           |           |
|---------------------------|------------------------------------------------------------|------------|-----------|-----------|-----------|-----------|
|                           | ALC                                                        | ALCw       | ALCm      | NC        | NCw       | NCm       |
| <i>Mean</i>               | 81.4                                                       | 85.3       | 77.4      | 81.0      | 79.0      | 82.9      |
| <i>Standard Deviation</i> | 11.5                                                       | 6.8        | 13.8      | 9.7       | 10.7      | 8.4       |
| <i>Range</i>              | 50.0-97.5                                                  | 66.0-96.3  | 50.0-97.5 | 54.9-96.9 | 54.9-92.6 | 71.0-96.9 |
|                           | Percent Correct Responses by Distractor                    |            |           |           |           |           |
|                           | ALC                                                        | ALCw       | ALCm      | NC        | NCw       | NCm       |
| Alcoholic Beverages       |                                                            |            |           |           |           |           |
| <i>Mean</i>               | 81.4                                                       | 85.3       | 77.5      | 81.4      | 79.1      | 83.7      |
| <i>Standard Deviation</i> | 12.4                                                       | 7.4        | 15.0      | 11.4      | 12.9      | 9.5       |
| <i>Range</i>              | 45.8-98.1                                                  | 66.7-96.3  | 45.8-98.1 | 51.9-98.1 | 51.9-98.1 | 64.8-98.1 |
| Nonalcoholic Beverages    |                                                            |            |           |           |           |           |
| <i>Mean</i>               | 82.1                                                       | 85.3       | 78.9      | 81.1      | 80.5      | 81.8      |
| <i>Standard Deviation</i> | 10.8                                                       | 7.7        | 12.5      | 9.0       | 9.2       | 9.0       |
| <i>Range</i>              | 53.7-98.1                                                  | 68.8-98.1  | 53.7-96.3 | 57.4-94.4 | 57.4-91.7 | 64.8-94.4 |
| Scrambled Pictures        |                                                            |            |           |           |           |           |
| <i>Mean</i>               | 80.6                                                       | 85.3       | 75.9      | 80.4      | 77.5      | 83.2      |
| <i>Standard Deviation</i> | 13.6                                                       | 8.6        | 16.1      | 11.1      | 12.1      | 9.4       |
| <i>Range</i>              | 44.4-98.1                                                  | 62.5-98.1  | 44.4-98.1 | 51.9-98.1 | 51.9-91.7 | 61.1-98.1 |
|                           | Percent Correct Responses by Facial Emotion <sup>def</sup> |            |           |           |           |           |
|                           | ALC                                                        | ALCw       | ALCm      | NC        | NCw       | NCm       |
| Positive Faces            |                                                            |            |           |           |           |           |
| <i>Mean</i>               | 82.4                                                       | 86.8       | 78.1      | 80.7      | 79.4      | 82.0      |
| <i>Standard Deviation</i> | 12.5                                                       | 9.0        | 14.2      | 10.4      | 11.9      | 8.7       |
| <i>Range</i>              | 51.9-100.0                                                 | 56.3-100.0 | 51.9-96.3 | 51.9-96.3 | 51.9-94.4 | 70.4-96.3 |
| Negative Faces            |                                                            |            |           |           |           |           |
| <i>Mean</i>               | 81.9                                                       | 85.9       | 77.8      | 82.9      | 80.9      | 84.9      |
| <i>Standard Deviation</i> | 12.0                                                       | 7.2        | 14.4      | 9.5       | 11.0      | 7.5       |
| <i>Range</i>              | 46.3-98.1                                                  | 68.8-98.1  | 46.3-98.1 | 53.7-98.1 | 53.7-94.4 | 72.2-98.1 |
| Neutral Faces             |                                                            |            |           |           |           |           |
| <i>Mean</i>               | 79.8                                                       | 83.2       | 76.4      | 79.3      | 76.7      | 81.9      |
| <i>Standard Deviation</i> | 11.8                                                       | 7.5        | 14.3      | 11.2      | 11.1      | 10.9      |
| <i>Range</i>              | 51.9-98.1                                                  | 62.5-92.6  | 51.9-98.1 | 50.0-96.3 | 50.0-92.6 | 63.0-96.3 |

877 **Table A1. Behavioral task percent correct responses**

878 Scores for accuracy are provided for overall performance, distractor type, and facial emotion. <sup>a</sup>Group x Gender;  
 879 <sup>b</sup>Alcoholic Women > Alcoholic Men; <sup>c</sup>Alcoholic Women > Control Women; <sup>d</sup>Emotion main effect; <sup>e</sup>Positive Faces  
 880 > Neutral Faces; <sup>f</sup>Negative Faces > Neutral Faces; all  $p < 0.5$ . Abbreviations: ALCw = Alcoholic Women; ALCm =  
 881 Alcoholic Men; NCw = Nonalcoholic Control Women; NCm = Nonalcoholic Control Men.  
 882

883

|                             | ALC<br>n = 42   | NC<br>n = 42    | ALCw<br>n = 21  | ALCm<br>n = 21  | NCw<br>n = 21   | NCm<br>n = 21   |
|-----------------------------|-----------------|-----------------|-----------------|-----------------|-----------------|-----------------|
| All Trials (ms)             |                 |                 |                 |                 |                 |                 |
| mean                        | 1374.0          | 1302.9          | 1263.4          | 1484.6          | 1319.3          | 1286.5          |
| standard deviation          | 418.2           | 300.0           | 213.0           | 536.1           | 337.2           | 265.0           |
| range                       | 896.6 - 2720.8  | 799.6 - 2164.9  | 896.6 - 1699.5  | 922.8 - 2720.8  | 931.2 - 2164.9  | 799.6 - 1812.7  |
| Correct Trials (ms)         |                 |                 |                 |                 |                 |                 |
| mean                        | 1317.6          | 1254.9          | 1229.4          | 1405.9          | 1263.1          | 1246.7          |
| standard deviation          | 377.0           | 288.1           | 207.9           | 481.5           | 321.1           | 258.7           |
| range                       | 889.7 - 2454.1  | 784.2 - 2129.2  | 889.7 - 1649.3  | 912.4 - 2454.1  | 909.0 - 2129.2  | 784.2 - 1795.1  |
| Incorrect Trials (ms)       |                 |                 |                 |                 |                 |                 |
| mean                        | 1686.2          | 1564.2          | 1532.4          | 1840.0          | 1591.0          | 1537.5          |
| standard deviation          | 538.2           | 328.2           | 285.2           | 680.3           | 376.8           | 278.1           |
| range                       | 1079.8 - 3883.9 | 1064.2 - 2480.1 | 1160.8 - 2374.8 | 1079.8 - 3883.9 | 1064.2 - 2480.1 | 1097.1 - 1939.1 |
|                             | ALC             | NC              | ALCw            | ALCm            | NCw             | NCm             |
| Alcoholic Beverages (ms)    |                 |                 |                 |                 |                 |                 |
| mean                        | 1318.3          | 1252.2          | 1235.4          | 1401.1          | 1261.7          | 1242.7          |
| standard deviation          | 360.9           | 292.1           | 216.4           | 453.6           | 320.2           | 268.6           |
| range                       | 866.2 - 2367.9  | 765.7 - 2101.9  | 866.2 - 1578.8  | 926.1 - 2367.9  | 906.8 - 2101.9  | 765.7 - 1837.5  |
| Nonalcoholic Beverages (ms) |                 |                 |                 |                 |                 |                 |
| mean                        | 1312.4          | 1257.5          | 1215.5          | 1409.3          | 1270.6          | 1244.5          |
| standard deviation          | 419.1           | 304.9           | 208.2           | 545.0           | 346.9           | 264.4           |
| range                       | 886.8 - 2682.0  | 779.7 - 2274.0  | 886.8 - 1686.6  | 902.8 - 2682.0  | 910.8 - 2274.0  | 779.7 - 1894.5  |
| Scrambled Pictures (ms)     |                 |                 |                 |                 |                 |                 |
| mean                        | 1324.2          | 1255.9          | 1235.7          | 1412.7          | 1255.8          | 1256.0          |
| standard deviation          | 378.8           | 281.8           | 213.1           | 482.0           | 306.5           | 262.5           |
| range                       | 888.7 - 2678.9  | 806.6 - 2004.1  | 914.9 - 1686.1  | 888.7 - 2678.9  | 882.4 - 2004.1  | 806.6 - 1825.8  |
|                             | ALC             | NC              | ALCw            | ALCm            | NCw             | NCm             |
| Positive Faces (ms)         |                 |                 |                 |                 |                 |                 |
| mean                        | 1290.5          | 1241.2          | 1227.9          | 1353.1          | 1238.4          | 1244.0          |
| standard deviation          | 347.2           | 279.5           | 229.3           | 431.6           | 306.7           | 257.0           |
| range                       | 867.7 - 2608.6  | 789.2 - 2015.1  | 867.7 - 1617.1  | 894.3 - 2608.6  | 870.0 - 2015.1  | 789.2 - 1871.9  |
| Negative Faces (ms)         |                 |                 |                 |                 |                 |                 |
| mean                        | 1303.9          | 1251.2          | 1225.7          | 1382.0          | 1264.3          | 1238.0          |
| standard deviation          | 322.5           | 294.0           | 186.2           | 407.2           | 323.2           | 269.1           |
| range                       | 900.0 - 2218.6  | 778.9 - 2128.5  | 900.0 - 1674.6  | 918.8 - 2218.6  | 889.4 - 2128.5  | 778.9 - 1803.4  |
| Neutral Faces (ms)          |                 |                 |                 |                 |                 |                 |
| mean                        | 1356.4          | 1272.4          | 1233.6          | 1479.2          | 1286.8          | 1258.0          |
| standard deviation          | 492.4           | 307.0           | 235.3           | 640.3           | 346.8           | 269.4           |
| range                       | 857.7 - 3051.0  | 784.4 - 2226.0  | 857.7 - 1724.7  | 887.4 - 3051.0  | 875.3 - 2226.0  | 784.4 - 1706.6  |
|                             | ALC             | NC              | ALCw            | ALCm            | NCw             | NCm             |
| Female Faces (ms)           |                 |                 |                 |                 |                 |                 |
| mean                        | 1321.8          | 1272.3          | 1237.9          | 1405.7          | 1275.2          | 1269.4          |
| standard deviation          | 369.4           | 288.7           | 206.9           | 471.3           | 311.5           | 271.8           |
| range                       | 903.8 - 2648.9  | 812.7 - 2089.0  | 903.8 - 1692.7  | 930.6 - 2648.9  | 919.7 - 2089.0  | 812.7 - 1830.5  |
| Male Faces (ms)             |                 |                 |                 |                 |                 |                 |
| mean                        | 1314.0          | 1237.0          | 1220.4          | 1407.6          | 1249.7          | 1224.3          |
| standard deviation          | 403.4           | 292.6           | 212.4           | 519.7           | 332.7           | 254.0           |
| range                       | 872.0 - 2797.2  | 756.1 - 2159.7  | 875.7 - 1605.9  | 872.0 - 2797.2  | 880.1 - 2159.7  | 756.1 - 1826.1  |

884 **Table A2. Reaction times**

885 Group reaction times in milliseconds are provided for distractor type, facial emotion, and face gender. Footnotes  
886 indicate significant differences, all  $p < 0.5$ : <sup>a</sup>Group x Gender interaction; <sup>b</sup>Alcoholic Women > Alcoholic Men;  
887 <sup>c</sup>Alcoholic Women > Control Women; <sup>d</sup>Emotion main effect; <sup>e</sup>Positive Faces > Neutral Faces; <sup>f</sup>Negative Faces >  
888 Neutral Faces. Abbreviations: ALCw = Alcoholic Women; ALCm = Alcoholic Men; NCw = Nonalcoholic Control  
889 Women; NCm = Nonalcoholic Control Men.

890

891



892

| Group | Fixation Masking | Contrast             | Annotation               | HemiMax | VtxMax | Size (mm <sup>2</sup> ) | MNLX     | MNIY  | MNIZ  | CWP   | CWPLow  | CWPHI   | NVtxs   |       |
|-------|------------------|----------------------|--------------------------|---------|--------|-------------------------|----------|-------|-------|-------|---------|---------|---------|-------|
| ALCw  | fixation-regions | alcbv > nonalcbv     | inferioparietal          | L       | 5.777  | 78109                   | 894.36   | -46.9 | -56.2 | 24.6  | 0.0003  | 0       | 0.0006  | 1808  |
| ALCw  | fixation-regions | alcbv > nonalcbv     | superiorfrontal          | L       | 5.198  | 117174                  | 2021.3   | -7.3  | 50.7  | 20.6  | 0.0003  | 0       | 0.0006  | 3312  |
| ALCw  | fixation-regions | alcbv > nonalcbv     | precuneus                | L       | 4.279  | 104685                  | 1114.58  | -6.4  | -64   | 36.3  | 0.0003  | 0       | 0.0006  | 2313  |
| ALCw  | fixation-regions | alcbv > nonalcbv     | middletemporal           | L       | 3.397  | 132409                  | 372.86   | -57.9 | -28.2 | -12.3 | 0.0006  | 0       | 0.0012  | 643   |
| ALCw  | fixation-regions | alcbv > nonalcbv     | precuneus                | R       | 5.031  | 78184                   | 343.04   | 8.9   | -53.5 | 21.9  | 0.0006  | 0       | 0.0012  | 905   |
| ALCw  | fixation-regions | alcbv > nonalcbv     | superiorfrontal          | R       | 3.007  | 33332                   | 470.55   | 7.4   | 44.5  | 26.4  | 0.0003  | 0       | 0.0006  | 773   |
| ALCw  | fixation-regions | alcbv > nonalcbv     | middletemporal           | R       | 2.388  | 149193                  | 390.07   | 57.3  | -28.2 | -12.1 | 0.0003  | 0       | 0.0006  | 583   |
| NCm   | fixation-regions | alcbv > nonalcbv     | precuneus                | L       | 2.001  | 28044                   | 372.78   | -5.8  | -61.1 | 26    | 0.0003  | 0       | 0.0006  | 722   |
| NCm   | fixation-regions | alcbv > nonalcbv     | inferioparietal          | R       | 2.093  | 87534                   | 353.25   | 48    | -63.2 | 30.4  | 0.0003  | 0       | 0.0006  | 646   |
| NCw   | fixation-regions | alcbv > nonalcbv     | rostralanteriorcingulate | L       | 3.853  | 72938                   | 1014.62  | -5.7  | 40.1  | -1    | 0.0003  | 0       | 0.0006  | 1732  |
| NCw   | fixation-regions | alcbv > nonalcbv     | precuneus                | L       | 3.518  | 88451                   | 552.66   | -6.9  | -55   | 16.2  | 0.0003  | 0       | 0.0006  | 1155  |
| NCw   | fixation-regions | alcbv > nonalcbv     | superiorfrontal          | L       | 3.043  | 106164                  | 573.38   | -7.2  | 53.9  | 28.3  | 0.0003  | 0       | 0.0006  | 853   |
| NCw   | fixation-regions | alcbv > nonalcbv     | superiorfrontal          | L       | 2.719  | 37125                   | 231.3    | -13.6 | 43.2  | 41.7  | 0.01344 | 0.01106 | 0.01611 | 411   |
| NCw   | fixation-regions | alcbv > nonalcbv     | superiorfrontal          | R       | 3.812  | 154767                  | 425.34   | 11.2  | 50.9  | 9.2   | 0.0003  | 0       | 0.0006  | 716   |
| NCw   | fixation-regions | alcbv > nonalcbv     | superiorfrontal          | R       | 2.997  | 141183                  | 288      | 9.1   | 53.1  | 23.9  | 0.0006  | 0       | 0.0012  | 467   |
| NCw   | fixation-regions | alcbv > nonalcbv     | precuneus                | R       | 2.381  | 20851                   | 168.89   | 12.5  | -44.6 | 37.9  | 0.03762 | 0.03352 | 0.04171 | 460   |
| ALCm  | fixation-regions | alcbv > scrambled    | superiortemporal         | L       | 3.628  | 127514                  | 287.34   | -52.7 | -19   | -6    | 0.02056 | 0.0176  | 0.02381 | 534   |
| ALCm  | fixation-regions | alcbv > scrambled    | inferioparietal          | L       | 3.532  | 77987                   | 597.66   | -39.4 | -65.2 | 28.3  | 0.0003  | 0       | 0.0006  | 1239  |
| ALCm  | fixation-regions | alcbv > scrambled    | precuneus                | L       | 3.011  | 42213                   | 1099.78  | -4.6  | -65.4 | 30.8  | 0.0003  | 0       | 0.0006  | 2316  |
| ALCm  | fixation-regions | alcbv > scrambled    | temporalpole             | R       | 3.202  | 75073                   | 255.04   | 36.1  | 15.1  | -37.4 | 0.00389 | 0.0027  | 0.00539 | 399   |
| ALCm  | fixation-regions | alcbv > scrambled    | middletemporal           | R       | 2.184  | 32116                   | 246.83   | 55.8  | -14   | -19.7 | 0.00479 | 0.0033  | 0.00629 | 358   |
| ALCw  | fixation-regions | alcbv > scrambled    | superiorfrontal          | L       | 6.192  | 119696                  | 1479.43  | -9    | 45    | 32.5  | 0.0003  | 0       | 0.0006  | 2382  |
| ALCw  | fixation-regions | alcbv > scrambled    | isthmuscingulate         | L       | 4.52   | 21771                   | 1599.1   | -4.6  | -46.8 | 28.5  | 0.0003  | 0       | 0.0006  | 3485  |
| ALCw  | fixation-regions | alcbv > scrambled    | inferioparietal          | L       | 3.772  | 8342                    | 1007.44  | -46.3 | -55.6 | 24.1  | 0.0003  | 0       | 0.0006  | 1999  |
| ALCw  | fixation-regions | alcbv > scrambled    | medialorbitofrontal      | L       | 3.625  | 141106                  | 792.29   | -10.2 | 46.2  | -9.5  | 0.0003  | 0       | 0.0006  | 1321  |
| ALCw  | fixation-regions | alcbv > scrambled    | middletemporal           | L       | 3.4    | 132407                  | 461.02   | -57.4 | -28.8 | -12.1 | 0.0006  | 0       | 0.0012  | 831   |
| ALCw  | fixation-regions | alcbv > scrambled    | precuneus                | R       | 4.528  | 147039                  | 407.44   | 6     | -56.9 | 22.3  | 0.0003  | 0       | 0.0006  | 1063  |
| ALCw  | fixation-regions | alcbv > scrambled    | rostralmiddlefrontal     | R       | 2.928  | 77385                   | 752.89   | 18.2  | 52.8  | 24.8  | 0.0003  | 0       | 0.0006  | 1197  |
| ALCw  | fixation-regions | alcbv > scrambled    | superiorfrontal          | R       | 2.644  | 116693                  | 213.6    | 7.6   | 40.8  | 48.1  | 0.01937 | 0.01641 | 0.02233 | 351   |
| NCm   | fixation-regions | alcbv > scrambled    | isthmuscingulate         | L       | 4.044  | 159377                  | 1127.18  | -7.7  | -52   | 21.5  | 0.0003  | 0       | 0.0006  | 2355  |
| NCm   | fixation-regions | alcbv > scrambled    | middletemporal           | L       | 3.081  | 46308                   | 253.13   | -57.3 | -4.8  | -25.2 | 0.02056 | 0.0176  | 0.02381 | 442   |
| NCm   | fixation-regions | alcbv > scrambled    | medialorbitofrontal      | L       | 2.523  | 119804                  | 386.08   | -7.7  | 57.4  | -7.9  | 0.0006  | 0       | 0.0012  | 508   |
| NCm   | fixation-regions | alcbv > scrambled    | superiorfrontal          | L       | 2.157  | 34872                   | 247.83   | -9.7  | 53.4  | 17    | 0.0241  | 0.02085 | 0.02764 | 349   |
| NCm   | fixation-regions | alcbv > scrambled    | inferioparietal          | L       | 2.069  | 117757                  | 286.31   | -34.4 | -81.3 | 30    | 0.00987 | 0.00778 | 0.01195 | 501   |
| NCm   | fixation-regions | alcbv > scrambled    | inferioparietal          | R       | 3.908  | 130241                  | 606.24   | 46.4  | -53.3 | 29.1  | 0.0003  | 0       | 0.0006  | 1136  |
| NCm   | fixation-regions | alcbv > scrambled    | superiorfrontal          | R       | 3.772  | 154660                  | 398.31   | 9.2   | 56.8  | 18    | 0.0006  | 0       | 0.0012  | 677   |
| NCm   | fixation-regions | alcbv > scrambled    | isthmuscingulate         | R       | 2.376  | 85932                   | 344.91   | 6.8   | -49.7 | 13.4  | 0.0024  | 0.0015  | 0.0036  | 887   |
| NCm   | fixation-regions | alcbv > scrambled    | superiorfrontal          | R       | 2.322  | 18118                   | 261.88   | 16.4  | 54.6  | 19.9  | 0.01165 | 0.00927 | 0.01403 | 332   |
| NCw   | fixation-regions | alcbv > scrambled    | superiorfrontal          | L       | 3.775  | 145688                  | 785.15   | -9.1  | 60.9  | 21    | 0.0003  | 0       | 0.0006  | 1299  |
| NCw   | fixation-regions | alcbv > scrambled    | medialorbitofrontal      | L       | 3.35   | 98461                   | 869.42   | -9.6  | 51.2  | -4.8  | 0.0003  | 0       | 0.0006  | 1367  |
| NCw   | fixation-regions | alcbv > scrambled    | middletemporal           | L       | 2.379  | 13182                   | 203.24   | -51.4 | -12.3 | -20.5 | 0.04171 | 0.03733 | 0.04607 | 350   |
| ALCm  | fixation-regions | nonalcbv > scrambled | superiortemporal         | L       | 3.138  | 161045                  | 299.84   | -48.8 | -10.7 | -17.9 | 0.01225 | 0.00987 | 0.01463 | 585   |
| ALCw  | fixation-regions | nonalcbv > scrambled | rostralmiddlefrontal     | L       | 3.585  | 82490                   | 424.57   | -18.9 | 43.9  | 33.7  | 0.0003  | 0       | 0.0006  | 719   |
| ALCw  | fixation-regions | nonalcbv > scrambled | superiorfrontal          | R       | 2.628  | 35019                   | 244.79   | 14.4  | 53.7  | 26.1  | 0.00867 | 0.00659 | 0.01076 | 393   |
| NCm   | fixation-regions | nonalcbv > scrambled | superiorfrontal          | R       | 3.123  | 149679                  | 531.99   | 10.9  | 44.1  | 42.5  | 0.0003  | 0       | 0.0006  | 861   |
| NCm   | fixation-regions | nonalcbv > scrambled | caudalmiddlefrontal      | R       | 2.592  | 63876                   | 228.53   | 32    | 25.7  | 44.4  | 0.03762 | 0.03352 | 0.04171 | 420   |
| ALCm  | task-regions     | alcbv > nonalcbv     | precuneus                | L       | 3.84   | 30022                   | 820.45   | -9.8  | -74.1 | 42.2  | 0.0003  | 0       | 0.0006  | 1681  |
| ALCm  | task-regions     | alcbv > nonalcbv     | inferioparietal          | L       | 3.068  | 156958                  | 724.95   | -46.8 | -63.5 | 10.3  | 0.0009  | 0.0003  | 0.0015  | 1254  |
| ALCm  | task-regions     | alcbv > nonalcbv     | lateraloccipital         | R       | 2.796  | 46455                   | 556.39   | 41.8  | -68.3 | -4.7  | 0.0176  | 0.01463 | 0.02056 | 770   |
| ALCw  | task-regions     | alcbv > nonalcbv     | fusiform                 | L       | 4.553  | 127987                  | 3039.55  | -41.4 | -52.4 | -18.5 | 0.0003  | 0       | 0.0006  | 5083  |
| ALCw  | task-regions     | alcbv > nonalcbv     | lateralorbitofrontal     | L       | 3.917  | 9114                    | 696      | -32.3 | 25    | -18.9 | 0.00509 | 0.0036  | 0.00659 | 1456  |
| ALCw  | task-regions     | alcbv > nonalcbv     | parsopercularis          | L       | 3.709  | 110686                  | 543.82   | -46.6 | 22.6  | 7.6   | 0.03    | 0.02617 | 0.03381 | 1090  |
| ALCw  | task-regions     | alcbv > nonalcbv     | inferioparietal          | L       | 3.231  | 29327                   | 517.43   | -44.1 | -69.1 | 20.8  | 0.04054 | 0.03616 | 0.04491 | 881   |
| ALCw  | task-regions     | alcbv > nonalcbv     | inferioparietal          | R       | 2.89   | 158246                  | 972.39   | 42.5  | -64.4 | 7.1   | 0.0003  | 0       | 0.0006  | 1681  |
| NCw   | task-regions     | alcbv > nonalcbv     | superioparietal          | L       | 2.749  | 100056                  | 696.49   | -21.3 | -56.6 | 62.3  | 0.0036  | 0.0024  | 0.00509 | 1504  |
| ALCm  | task-regions     | alcbv > scrambled    | lateraloccipital         | L       | 6.82   | 112623                  | 9254.88  | -23.5 | -93.1 | 1.2   | 0.0003  | 0       | 0.0006  | 14918 |
| ALCm  | task-regions     | alcbv > scrambled    | precentral               | L       | 5.097  | 102385                  | 1154.47  | -27.7 | -22.4 | 62.9  | 0.0003  | 0       | 0.0006  | 2780  |
| ALCm  | task-regions     | alcbv > scrambled    | bankssts                 | L       | 3.981  | 86601                   | 489.82   | -50.3 | -43.9 | -0.6  | 0.03146 | 0.02764 | 0.03528 | 1124  |
| ALCm  | task-regions     | alcbv > scrambled    | lateraloccipital         | R       | 5.32   | 129176                  | 5250.06  | 25.7  | -97.9 | -2    | 0.0003  | 0       | 0.0006  | 7456  |
| ALCm  | task-regions     | alcbv > scrambled    | precentral               | R       | 2.656  | 72522                   | 782.86   | 42.6  | -11.6 | 29.6  | 0.0009  | 0.0003  | 0.0015  | 1824  |
| ALCw  | task-regions     | alcbv > scrambled    | fusiform                 | L       | 6.095  | 34311                   | 13105.37 | -29.1 | -78.2 | -9    | 0.0003  | 0       | 0.0006  | 20562 |
| ALCw  | task-regions     | alcbv > scrambled    | isthmuscingulate         | L       | 4.555  | 57611                   | 563.79   | -7.7  | -42.1 | 26.1  | 0.02587 | 0.02233 | 0.02941 | 1660  |
| ALCw  | task-regions     | alcbv > scrambled    | parsopercularis          | L       | 4.416  | 20526                   | 2644.35  | -49.9 | 21.3  | 8.8   | 0.0003  | 0       | 0.0006  | 4925  |
| ALCw  | task-regions     | alcbv > scrambled    | superiorfrontal          | L       | 3.915  | 133846                  | 522.69   | -6.6  | 17.8  | 61.3  | 0.03937 | 0.03498 | 0.04375 | 926   |
| ALCw  | task-regions     | alcbv > scrambled    | lateraloccipital         | R       | 8.832  | 119142                  | 12539.17 | 28.1  | -96.8 | -1.5  | 0.0003  | 0       | 0.0006  | 19287 |
| ALCw  | task-regions     | alcbv > scrambled    | superiorfrontal          | R       | 3.963  | 47146                   | 785.28   | 7.9   | 18.3  | 50.6  | 0.003   | 0.0018  | 0.00419 | 1569  |
| ALCw  | task-regions     | alcbv > scrambled    | lateralorbitofrontal     | R       | 3.159  | 37696                   | 1035.15  | 39.4  | 30.1  | -13   | 0.0003  | 0       | 0.0006  | 1916  |
| ALCw  | task-regions     | alcbv > scrambled    | rostralmiddlefrontal     | R       | 2.655  | 37107                   | 1604.06  | 40    | 25    | 34.3  | 0.0003  | 0       | 0.0006  | 2901  |
| NCm   | task-regions     | alcbv > scrambled    | lateraloccipital         | L       | 6.805  | 122808                  | 11030.59 | -15.2 | -95.6 | -12.9 | 0.0003  | 0       | 0.0006  | 17180 |
| NCm   | task-regions     | alcbv > scrambled    | fusiform                 | R       | 6.25   | 92502                   | 10153.11 | 35.9  | -72.4 | -12.4 | 0.0003  | 0       | 0.0006  | 15436 |
| NCm   | task-regions     | alcbv > scrambled    | precuneus                | R       | 2.429  | 98061                   | 571.75   | 10.4  | -53.3 | 44.6  | 0.01017 | 0.00808 | 0.01255 | 1490  |
| NCw   | task-regions     | alcbv > scrambled    | fusiform                 | L       | 4.853  | 48274                   | 2961.14  | -29.9 | -63.8 | -13.1 | 0.0003  | 0       | 0.0006  | 4221  |
| NCw   | task-regions     | alcbv > scrambled    | inferioparietal          | L       | 3.525  | 45896                   | 469.12   | -43.9 | -64.9 | 9     | 0.02292 | 0.01967 | 0.02617 | 941   |
| NCw   | task-regions     | alcbv > scrambled    | superioparietal          | L       | 2.819  | 157385                  | 433.04   | -24.2 | -63.1 | 49.2  | 0.04083 | 0.03645 | 0.0452  | 920   |
| NCw   | task-regions     | alcbv > scrambled    | superioparietal          | R       | 2.682  | 87111                   | 609.56   | -25.6 | -80.9 | 12.8  | 0.0018  | 0.0009  | 0.0027  | 1021  |
| NCw   | task-regions     | alcbv > scrambled    | lateraloccipital         | R       | 6.04   | 90488                   | 1846.73  | 25.4  | -89.2 | -9.5  | 0.0003  | 0       | 0.0006  | 3154  |
| NCw   | task-regions     | alcbv > scrambled    | lateraloccipital         | R       | 3.065  | 114637                  | 624.55   | 44.2  | -71.3 | -8    | 0.0009  | 0.0003  | 0.0015  | 881   |
| NCw   | task-regions     | alcbv > scrambled    | superioparietal          | R       | 2.97   | 157814                  | 450.45   | 31.1  | -73.7 | 17.1  | 0.02764 | 0.0241  | 0.0317  | 806   |
| ALCm  | task-regions     | nonalcbv > alcbv     | pericalcarine            | L       | -3.202 | 120908                  | 591.21   | -9.1  | -86.2 | -1    | 0.01225 | 0.00987 | 0.01463 | 837   |
| ALCm  | task-regions     | nonalcbv > alcbv     | pericalcarine            | R       | -1.915 | 43525                   | 692.03   | 17.9  | -69.6 | 10.6  | 0.003   | 0.0018  | 0.00419 | 1116  |
| NCm   | task-regions     | nonalcbv > alcbv     | lateraloccipital         | L       | -2.977 | 38531                   | 778.52   | -37.6 | -85.9 | -1.1  | 0.0006  | 0       | 0.0012  | 1036  |
| NCm   | task-regions     | nonalcbv > alcbv     | insula                   | L       | -2.786 | 96569                   | 492.26   | -32.9 | 9.5   | 1.4   | 0.03352 | 0.0297  | 0.03762 | 1158  |
| NCm   | task-regions     | nonalcbv > alcbv     | superiorfrontal          | L       | -2.596 | 67709                   | 754.6    | -9.5  | 6.9   |       |         |         |         |       |

|     |              |                      |                      |   |        |        |         |       |       |       |         |         |         |      |
|-----|--------------|----------------------|----------------------|---|--------|--------|---------|-------|-------|-------|---------|---------|---------|------|
| NCm | task-regions | nonalbev > scrambled | caudalmiddlefrontal  | R | 3.904  | 12394  | 494.97  | 38    | 3.2   | 38.1  | 0.03146 | 0.02764 | 0.03528 | 902  |
| NCm | task-regions | nonalbev > scrambled | postcentral          | R | 3.355  | 133589 | 467.15  | 38.7  | -31.1 | 47.5  | 0.04171 | 0.03733 | 0.04607 | 1096 |
| NCm | task-regions | nonalbev > scrambled | parsoptercularis     | R | 2.974  | 124506 | 913.39  | 50.3  | 14.1  | 7.6   | 0.0003  | 0       | 0.0006  | 1651 |
| NCw | task-regions | nonalbev > scrambled | inferiortemporal     | L | 5.321  | 90682  | 2566.11 | -44.4 | -56.4 | -7.1  | 0.0003  | 0       | 0.0006  | 3820 |
| NCw | task-regions | nonalbev > scrambled | superiorparietal     | L | 3.983  | 157473 | 694.61  | -22.7 | -63.1 | 31.1  | 0.0009  | 0.0003  | 0.0015  | 1415 |
| NCw | task-regions | nonalbev > scrambled | lateraloccipital     | R | 6.176  | 161836 | 3067.24 | 26.1  | -88.5 | -10.5 | 0.0003  | 0       | 0.0006  | 5033 |
| NCw | task-regions | nonalbev > scrambled | superiorparietal     | R | 4.612  | 135644 | 954.67  | 26.3  | -77.1 | 19.7  | 0.0003  | 0       | 0.0006  | 1801 |
| NCw | task-regions | scrambled > nonalbev | superiorfrontal      | L | -3.307 | 117186 | 558.06  | -9.7  | 30.8  | 30.9  | 0.00479 | 0.0033  | 0.00629 | 1158 |
| NCw | task-regions | scrambled > nonalbev | rostralmiddlefrontal | L | -2.669 | 99318  | 478.08  | -33.2 | 48.8  | 8.7   | 0.01314 | 0.01076 | 0.01582 | 699  |

893 **Table A3. Cortical cluster characteristics for significant contrasts within each group**

894 Annotations (from the peak voxel location in the Desikan-Killiany atlas) are shown for each of the 99 clusters with  
 895 significant distractor contrasts, calculated for each group separately. The clusters reported can be understood to span  
 896 multiple functional regions (Woo *et al.*, 2014). That is, they are not limited to a single region, as reported by the  
 897 maximal vertex or voxel. Abbreviations: Hemi = hemisphere; Max = maximum  $-\log_{10}(p\text{-value})$  for group  
 898 comparison in the cluster; VtxMax = vertex number at the maximum; Size = surface area of cluster; MNIX, MNIY,  
 899 and MNIZ = Montreal Neurological Institute 305-subject template coordinates X, Y, and Z for the maximum vertex;  
 900 CWP = cluster-wise  $p$ -value further corrected for the three spaces of left cortex, right cortex, and volume; CWPLow  
 901 and CWPHi = 90% confidence intervals for CWP; NVtxs = number of vertices in the cluster; alcbev = alcoholic  
 902 beverages; nonalbev = nonalcoholic beverages; L = left hemisphere; R = right hemisphere; bankssts = banks of the  
 903 superior temporal sulcus.  
 904

905

| Fixation Masking | Contrast              | Annotation           | Hemi | Max    | VtxMax | Size (mm <sup>2</sup> ) | MNIX  | MNIY  | MNIZ  | CWP     | CWPLow  | CWPHi   | NVtxs |
|------------------|-----------------------|----------------------|------|--------|--------|-------------------------|-------|-------|-------|---------|---------|---------|-------|
| fixation-regions | alcbev > scrambled    | superiorfrontal      | L    | -2.635 | 55177  | 313.89                  | -7.9  | 46.2  | 22.9  | 0.01136 | 0.00897 | 0.01374 | 461   |
| fixation-regions | alcbev > scrambled    | superiorfrontal      | R    | -3.304 | 146084 | 140.84                  | 16.5  | 53.5  | 24.4  | 0.0021  | 0.0012  | 0.003   | 201   |
| fixation-regions | alcbev > scrambled    | superiorfrontal      | R    | -2.453 | 134468 | 116.29                  | 12    | 47.4  | 13.5  | 0.01017 | 0.00808 | 0.01255 | 184   |
| fixation-regions | alcbev > scrambled    | precuneus            | R    | -1.444 | 122115 | 162.46                  | 9.6   | -54.5 | 24.9  | 0.0003  | 0       | 0.0006  | 418   |
| fixation-regions | nonalcbev > scrambled | superiorfrontal      | R    | -3.422 | 59361  | 133.19                  | 7.6   | 44.3  | 38.6  | 0.0003  | 0       | 0.0006  | 242   |
| fixation-regions | nonalcbev > scrambled | superiorfrontal      | R    | -3.143 | 8241   | 206.58                  | 16    | 53.9  | 24.6  | 0.0003  | 0       | 0.0006  | 313   |
| fixation-regions | nonalcbev > scrambled | caudalmiddlefrontal  | R    | -2.747 | 29029  | 155.88                  | 27.8  | 19.3  | 42.7  | 0.0003  | 0       | 0.0006  | 297   |
| task-regions     | alcbev > scrambled    | superiorparietal     | L    | -1.996 | 64642  | 333.28                  | -22.2 | -84.9 | 23.6  | 0.00927 | 0.00718 | 0.01136 | 479   |
| task-regions     | alcbev > scrambled    | fusiform             | R    | -4.208 | 114347 | 1011.41                 | 31.8  | -74.4 | -11.2 | 0.0003  | 0       | 0.0006  | 1562  |
| task-regions     | alcbev > scrambled    | superiorparietal     | R    | -2.983 | 157893 | 409.83                  | 21.3  | -83.2 | 20.7  | 0.0012  | 0.0006  | 0.0021  | 627   |
| task-regions     | alcbev > scrambled    | lingual              | R    | -2.804 | 79452  | 375.68                  | 6.9   | -68.3 | 2.4   | 0.0027  | 0.0015  | 0.00389 | 473   |
| task-regions     | alcbev > scrambled    | superiorparietal     | R    | -2.679 | 93240  | 261.8                   | 24.9  | -60.1 | 48    | 0.03264 | 0.02882 | 0.03645 | 553   |
| task-regions     | nonalcbev > scrambled | superiorparietal     | L    | -2.534 | 120369 | 478.5                   | -17   | -88.7 | 20.5  | 0.0003  | 0       | 0.0006  | 709   |
| task-regions     | nonalcbev > scrambled | lateraloccipital     | R    | -3.465 | 132542 | 658.32                  | 29.9  | -85.6 | -12.5 | 0.0003  | 0       | 0.0006  | 985   |
| task-regions     | nonalcbev > scrambled | superiorparietal     | R    | -2.61  | 130192 | 242.3                   | 19.9  | -79.4 | 43    | 0.01908 | 0.01611 | 0.02204 | 404   |
| task-regions     | nonalcbev > scrambled | lateraloccipital     | R    | -2.437 | 61711  | 238.46                  | 21.3  | -87.7 | 18    | 0.02115 | 0.01789 | 0.0244  | 346   |
| task-regions     | scrambled > nonalcbev | superiorfrontal      | L    | -3.795 | 4781   | 140.18                  | -13.4 | 32.7  | 24.3  | 0.00718 | 0.00539 | 0.00897 | 238   |
| task-regions     | scrambled > nonalcbev | rostralmiddlefrontal | L    | -3.026 | 116230 | 173.7                   | -31.1 | 48.1  | 7.1   | 0.0012  | 0.0006  | 0.0021  | 258   |
| task-regions     | scrambled > nonalcbev | superiorfrontal      | L    | -1.97  | 153483 | 148                     | -12   | 18.5  | 36.9  | 0.00449 | 0.003   | 0.00599 | 327   |
| task-regions     | scrambled > nonalcbev | rostralmiddlefrontal | L    | -1.861 | 36306  | 136.94                  | -36.8 | 31.1  | 29.6  | 0.00897 | 0.00688 | 0.01106 | 200   |
| task-regions     | nonalcbev > alcbev    | superiorfrontal      | L    | 3.14   | 140803 | 102.82                  | -8.9  | 30.4  | 32    | 0.04287 | 0.0385  | 0.04724 | 180   |
| task-regions     | nonalcbev > alcbev    | superiorfrontal      | L    | 2.283  | 110024 | 120.81                  | -12.3 | 17.2  | 36.8  | 0.01403 | 0.01136 | 0.01671 | 290   |

906 **Table A4. Cortical cluster characteristics for significant Group-by-Gender interactions**

907 Annotations (from the peak voxel location in the Desikan-Killiany atlas) are shown separately for each of the 22  
 908 clusters with significant Group-by-Gender interactions for distractor contrasts. The clusters reported can be  
 909 understood to span multiple functional regions (Woo *et al.*, 2014). That is, they are not limited to a single region, as  
 910 reported by the maximal vertex or voxel. Abbreviations: Hemi = hemisphere; Max = maximum  $-\log_{10}(p\text{-value})$  for  
 911 group comparison in the cluster; VtxMax = vertex number at the maximum; Size = surface area of cluster; MNIX,  
 912 MNIY, and MNIZ = Montreal Neurological Institute 305-subject template coordinates X, Y, and Z for the  
 913 maximum vertex; CWP = cluster-wise  $p$ -value further corrected for the three spaces of left cortex, right cortex, and  
 914 volume; CWPLow and CWPHi = 90% confidence intervals for CWP; NVtxs = number of vertices in the cluster;  
 915 alcbev = alcoholic beverages; nonalcbev = nonalcoholic beverages; L = left hemisphere; R = right hemisphere. See  
 916 Table 2 for a summary of the cluster information provided here.  
 917

918

| Fixation Masking | Contrast              | Annotation           | Hemi | Max   | VtxMax | Size (mm <sup>2</sup> ) | MNIX  | MNIY  | MNIZ  | CWP     | CWPLow  | CWPHi   | NVtxs |
|------------------|-----------------------|----------------------|------|-------|--------|-------------------------|-------|-------|-------|---------|---------|---------|-------|
| fixation-regions | alcbev > scrambled    | inferioparietal      | L    | 4.631 | 58681  | 489.84                  | -50.5 | -55   | 23.8  | 0.0003  | 0       | 0.0006  | 1036  |
| fixation-regions | nonalcbev > scrambled | isthmuscingulate     | L    | 1.92  | 93859  | 136.3                   | -14.5 | -53.6 | 7.6   | 0.00748 | 0.00569 | 0.00927 | 325   |
| task-regions     | alcbev > nonalcbev    | bankssts             | L    | 3.748 | 1233   | 327.69                  | -50.5 | -38.3 | 2.9   | 0.0003  | 0       | 0.0006  | 773   |
| task-regions     | alcbev > nonalcbev    | lateralorbitofrontal | L    | 3.411 | 67740  | 392.95                  | -42.1 | 27.4  | -14.3 | 0.0003  | 0       | 0.0006  | 737   |
| task-regions     | alcbev > nonalcbev    | superioparietal      | L    | 2.862 | 123629 | 420.39                  | -30.7 | -50.7 | 49.5  | 0.0003  | 0       | 0.0006  | 950   |
| task-regions     | alcbev > nonalcbev    | superiortemporal     | R    | 2.818 | 12074  | 230.32                  | 46.6  | -27.1 | -2.4  | 0.0006  | 0       | 0.0012  | 597   |
| task-regions     | alcbev > nonalcbev    | inferioparietal      | R    | 2.766 | 31474  | 167.47                  | 40    | -74.7 | 11.1  | 0.017   | 0.01403 | 0.01997 | 266   |
| task-regions     | alcbev > nonalcbev    | parsorbitalis        | R    | 2.692 | 27157  | 219.37                  | 47.2  | 36.2  | -10.5 | 0.0009  | 0.0003  | 0.0015  | 298   |
| task-regions     | alcbev > nonalcbev    | lateraloccipital     | R    | 2.249 | 56055  | 346.42                  | 42.2  | -72   | -5.8  | 0.0003  | 0       | 0.0006  | 461   |
| task-regions     | alcbev > scrambled    | superiortemporal     | L    | 4.221 | 86665  | 439.74                  | -47.3 | -31.5 | -3.3  | 0.00449 | 0.003   | 0.00599 | 1029  |
| task-regions     | alcbev > scrambled    | superiorfrontal      | L    | 3.663 | 129715 | 522.55                  | -7.2  | 24.4  | 46.7  | 0.0015  | 0.0006  | 0.0024  | 919   |
| task-regions     | alcbev > scrambled    | parsopercularis      | L    | 3.155 | 25042  | 876.27                  | -45.5 | 17.6  | 20.3  | 0.0003  | 0       | 0.0006  | 1611  |
| task-regions     | alcbev > scrambled    | parsorbitalis        | L    | 2.208 | 10768  | 301.1                   | -45.3 | 31.4  | -13.3 | 0.04578 | 0.04112 | 0.05043 | 621   |
| task-regions     | alcbev > scrambled    | superiorfrontal      | R    | 3.989 | 80231  | 427                     | 11.6  | 20.7  | 57.1  | 0.0003  | 0       | 0.0006  | 844   |
| task-regions     | alcbev > scrambled    | caudalmiddlefrontal  | R    | 1.867 | 100338 | 259.44                  | 38.9  | 7.5   | 55    | 0.03088 | 0.02705 | 0.03469 | 461   |

919 **Table A5. Cortical cluster characteristics for significant comparisons between ALC and**  
 920 **NC groups.**

921 The activation levels for all contrasts were significantly greater for the ALC group than for the NC group.  
 922 Annotations (from the peak voxel location in the Desikan-Killiany atlas) are shown separately for each of the 15  
 923 clusters with significant group comparisons for distractor contrasts. The clusters reported can be understood to span  
 924 multiple functional regions (Woo *et al.*, 2014). That is, they are not limited to a single region, as reported by the  
 925 maximal vertex or voxel. Abbreviations: Hemi = hemisphere; Max = maximum  $-\log_{10}(p\text{-value})$  for group  
 926 comparison in the cluster; VtxMax = vertex number at the maximum; Size = surface area of cluster; MNIX, MNIY,  
 927 and MNIZ = Montreal Neurological Institute 305-subject template coordinates X, Y, and Z for the maximum vertex;  
 928 CWP = cluster-wise  $p$ -value further corrected for the three spaces of left cortex, right cortex, and volume; CWPLow  
 929 and CWPHi = 90% confidence intervals for CWP; NVtxs = number of vertices in the cluster; alcbev = alcoholic  
 930 beverages; nonalcbev = nonalcoholic beverages; L = left hemisphere; R = right hemisphere; bankssts = banks of the  
 931 superior temporal sulcus.

932  
 933

934

## 935 **References**

- 936 Alba-Ferrara, L., Müller-Oehring, E.M., Sullivan, E.V., Pfefferbaum, A., & Schulte, T. (2016) Brain  
937 responses to emotional salience and reward in alcohol use disorder. *Brain Imaging Behav.*, **10**, 136–  
938 146.
- 939 Aron, A.R., Robbins, T.W., & Poldrack, R.A. (2004) Inhibition and the right inferior frontal cortex.  
940 *Trends Cogn. Sci.*, **8**, 170–177.
- 941 Avena, N.M., Rada, P., & Hoebel, B.G. (2008) Evidence for sugar addiction: behavioral and  
942 neurochemical effects of intermittent, excessive sugar intake. *Neurosci. Biobehav. Rev.*, **32**, 20–39.
- 943 Beaty, R.E., Benedek, M., Silvia, P.J., & Schacter, D.L. (2016) Creative Cognition and Brain Network  
944 Dynamics. *Trends Cogn. Sci.*, **20**, 87–95.
- 945 Becker, J.B., McClellan, M.L., & Reed, B.G. (2017) Sex differences, gender and addiction. *J. Neurosci.*  
946 *Res.*, **95**, 136–147.
- 947 Bednarski, S.R., Zhang, S., Hong, K.-I., Sinha, R., Rounsaville, B.J., & Li, C.-S.R. (2011) Deficits in  
948 default mode network activity preceding error in cocaine dependent individuals. *Drug Alcohol*  
949 *Depend.*, **119**, e51–e57.
- 950 Benishek, L.A., Bieschke, K.J., Stöffelmayr, B.E., Mavis, B.E., & Humphreys, K.A. (1992) Gender  
951 differences in depression and anxiety among alcoholics. *J. Subst. Abuse*, **4**, 235–245.
- 952 Bordnick, P.S., Traylor, A., Copp, H.L., Graap, K.M., Carter, B., Ferrer, M., & Walton, A.P. (2008)  
953 Assessing reactivity to virtual reality alcohol based cues. *Addict. Behav.*, **33**, 743–756.
- 954 Briggs, G.G. & Nebes, R.D. (1975) Patterns of hand preference in a student population. *Cortex*, **11**, 230–  
955 238.
- 956 Brighton, R., Moxham, L., & Traynor, V. (2016) Women and Alcohol Use Disorders: Factors That Lead  
957 to Harm. *J. Addict. Nurs.*, **27**, 205–213.
- 958 Broyd, S.J., Demanuele, C., Debener, S., Helps, S.K., James, C.J., & Sonuga-Barke, E.J.S. (2009)

- 959 Default-mode brain dysfunction in mental disorders: a systematic review. *Neurosci. Biobehav. Rev.*,  
960 **33**, 279–296.
- 961 Buckner, R.L. & DiNicola, L.M. (2019) The brain’s default network: updated anatomy, physiology and  
962 evolving insights. *Nat. Rev. Neurosci.*, **20**, 593–608.
- 963 Cahalan, D., Cisin, I.H., & Crossley, H.M. (1969) American drinking practices: A national study of  
964 drinking behavior and attitudes. *Monographs of the Rutgers Center of Alcohol Studies*, **6**, 260.
- 965 Carter, B.L. & Tiffany, S.T. (1999) Meta-analysis of cue-reactivity in addiction research. *Addiction*, **94**,  
966 327–340.
- 967 Chanraud, S., Pitel, A.-L., Pfefferbaum, A., & Sullivan, E.V. (2011) Disruption of functional connectivity  
968 of the default-mode network in alcoholism. *Cereb. Cortex*, **21**, 2272–2281.
- 969 Clapp, W.C., Rubens, M.T., & Gazzaley, A. (2010) Mechanisms of working memory disruption by  
970 external interference. *Cereb. Cortex*, **20**, 859–872.
- 971 Clark, U.S., Oscar-Berman, M., Shagrin, B., & Pencina, M. (2007) Alcoholism and judgments of  
972 affective stimuli. *Neuropsychology*, **21**, 346–362.
- 973 Dale, A.M. (1999) Optimal experimental design for event-related fMRI. *Hum. Brain Mapp.*, **8**, 109–114.
- 974 Dale, A.M., Fischl, B., & Sereno, M.I. (1999) Cortical surface-based analysis. I. Segmentation and  
975 surface reconstruction. *Neuroimage*, **9**, 179–194.
- 976 Desikan, R.S., Ségonne, F., Fischl, B., Quinn, B.T., Dickerson, B.C., Blacker, D., Buckner, R.L., Dale,  
977 A.M., Maguire, R.P., Hyman, B.T., Albert, M.S., & Killiany, R.J. (2006) An automated labeling  
978 system for subdividing the human cerebral cortex on MRI scans into gyral based regions of interest.  
979 *Neuroimage*, **31**, 968–980.
- 980 Destrieux, C., Fischl, B., Dale, A., & Halgren, E. (2010) Automatic parcellation of human cortical gyri  
981 and sulci using standard anatomical nomenclature. *Neuroimage*, **53**, 1–15.
- 982 Dolcos, F., LaBar, K.S., & Cabeza, R. (2005) Remembering one year later: role of the amygdala and the  
983 medial temporal lobe memory system in retrieving emotional memories. *Proc. Natl. Acad. Sci. U. S.*  
984 *A.*, **102**, 2626–2631.

- 985 Dolcos, F. & McCarthy, G. (2006) Brain systems mediating cognitive interference by emotional  
986 distraction. *J. Neurosci.*, **26**, 2072–2079.
- 987 Eklund, A., Nichols, T.E., & Knutsson, H. (2016) Cluster failure: Why fMRI inferences for spatial extent  
988 have inflated false-positive rates. *Proc. Natl. Acad. Sci. U. S. A.*, **113**, 7900–7905.
- 989 Fama, R., Le Berre, A.-P., & Sullivan, E.V. (2020) Alcohol's Unique Effects on Cognition in Women: A  
990 2020 (Re)view to Envision Future Research and Treatment. *Alcohol Res.*, **40**, 03.
- 991 Feldstein Ewing, S.W., Filbey, F.M., Chandler, L.D., & Hutchison, K.E. (2010) Exploring the  
992 relationship between depressive and anxiety symptoms and neuronal response to alcohol cues.  
993 *Alcohol. Clin. Exp. Res.*, **34**, 396–403.
- 994 Field, M. & Cox, W. (2008) Attentional bias in addictive behaviors: A review of its development, causes,  
995 and consequences. *Drug and Alcohol Dependence*, **97**, 1–20.
- 996 Field, M. & Eastwood, B. (2005) Experimental manipulation of attentional bias increases the motivation  
997 to drink alcohol. *Psychopharmacology* , **183**, 350–357.
- 998 Field, M., Marhe, R., & Franken, I.H.A. (2014) The clinical relevance of attentional bias in substance use  
999 disorders. *CNS Spectr.*, **19**, 225–230.
- 1000 Field, M., Mogg, K., Zetteler, J., & Bradley, B.P. (2004) Attentional biases for alcohol cues in heavy and  
1001 light social drinkers: the roles of initial orienting and maintained attention. *Psychopharmacology* ,  
1002 **176**, 88–93.
- 1003 Field, M., Munafò, M.R., & Franken, I.H.A. (2009) A meta-analytic investigation of the relationship  
1004 between attentional bias and subjective craving in substance abuse. *Psychol. Bull.*, **135**, 589–607.
- 1005 Fischl, B., Salat, D.H., Busa, E., Albert, M., Dieterich, M., Haselgrove, C., van der Kouwe, A., Killiany,  
1006 R., Kennedy, D., Klaveness, S., Montillo, A., Makris, N., Rosen, B., & Dale, A.M. (2002) Whole  
1007 brain segmentation: automated labeling of neuroanatomical structures in the human brain. *Neuron*,  
1008 **33**, 341–355.
- 1009 Fischl, B., Sereno, M.I., Tootell, R.B.H., & Dale, A.M. (1999) High-resolution intersubject averaging and  
1010 a coordinate system for the cortical surface. *Human Brain Mapping*, **8**, 272–284.

- 1011 Flannery, B.A., Volpicelli, J.R., & Pettinati, H.M. (1999) Psychometric properties of the Penn Alcohol  
1012 Craving Scale. *Alcohol. Clin. Exp. Res.*, **23**, 1289–1295.
- 1013 Franken, I.H.A. (2003) Drug craving and addiction: integrating psychological and  
1014 neuropsychopharmacological approaches. *Prog. Neuropsychopharmacol. Biol. Psychiatry*, **27**, 563–  
1015 579.
- 1016 Fryer, S.L., Jorgensen, K.W., Yetter, E.J., Daurignac, E.C., Watson, T.D., Shanbhag, H., Krystal, J.H., &  
1017 Mathalon, D.H. (2013) Differential brain response to alcohol cue distractors across stages of alcohol  
1018 dependence. *Biol. Psychol.*, **92**, 282–291.
- 1019 Garber, A.K. & Lustig, R.H. (2011) Is fast food addictive? *Curr. Drug Abuse Rev.*, **4**, 146–162.
- 1020 George, M.S., Anton, R.F., Bloomer, C., Teneback, C., Drobles, D.J., Lorberbaum, J.P., Nahas, Z., &  
1021 Vincent, D.J. (2001) Activation of prefrontal cortex and anterior thalamus in alcoholic subjects on  
1022 exposure to alcohol-specific cues. *Arch. Gen. Psychiatry*, **58**, 345–352.
- 1023 Goldstein, R.Z. & Volkow, N.D. (2002) Drug addiction and its underlying neurobiological basis:  
1024 neuroimaging evidence for the involvement of the frontal cortex. *Am. J. Psychiatry*, **159**, 1642–1652.
- 1025 Goldstein, R.Z. & Volkow, N.D. (2011) Dysfunction of the prefrontal cortex in addiction: neuroimaging  
1026 findings and clinical implications. *Nature Reviews Neuroscience*, **12**, 652–669.
- 1027 Greve, D.N. & Fischl, B. (2009) Accurate and robust brain image alignment using boundary-based  
1028 registration. *Neuroimage*, **48**, 63–72.
- 1029 Grüsser, S.M., Heinz, A., & Flor, H. (2000) Standardized stimuli to assess drug craving and drug memory  
1030 in addicts. *J. Neural Transm.*, **107**, 715–720.
- 1031 Hamilton, M. (1960) A rating scale for depression. *J. Neurol. Neurosurg. Psychiatry*, **23**, 56–62.
- 1032 Heilbronner, S.R. & Hayden, B.Y. (2016) Dorsal anterior cingulate cortex: A bottom-up view. *Annu. Rev.*  
1033 *Neurosci.*, **39**, 149–170.
- 1034 Heinz, A., Wrase, J., Kahnt, T., Beck, A., Bromand, Z., Grüsser, S.M., Kienast, T., Smolka, M.N., Flor,  
1035 H., & Mann, K. (2007) Brain activation elicited by affectively positive stimuli is associated with a  
1036 lower risk of relapse in detoxified alcoholic subjects. *Alcohol. Clin. Exp. Res.*, **31**, 1138–1147.



- 1037 Hoffman, L.A., Lewis, B., & Nixon, S.J. (2019) Neurophysiological and interpersonal correlates of  
1038 emotional face processing in Alcohol Use Disorder. *Alcohol. Clin. Exp. Res.*, **43**.
- 1039 Holdnack, J.A. & Drozdick, L.W. (2010) CHAPTER 9 - Using WAIS-IV with WMS-IV. In Weiss, L.G.,  
1040 Saklofske, D.H., Coalson, D.L., & Raiford, S.E. (eds), *WAIS-IV Clinical Use and Interpretation*.  
1041 Academic Press, San Diego, pp. 237–283.
- 1042 Jha, A.P., Fabian, S.A., & Aguirre, G.K. (2004) The role of prefrontal cortex in resolving distractor  
1043 interference. *Cogn. Affect. Behav. Neurosci.*, **4**, 517–527.
- 1044 Kaag, A.M., Wiers, R.W., de Vries, T.J., Pattij, T., & Goudriaan, A.E. (2019) Striatal alcohol cue-  
1045 reactivity is stronger in male than female problem drinkers. *Eur. J. Neurosci.*, **50**, 2264–2273.
- 1046 Koob, G.F. & Volkow, N.D. (2010) Neurocircuitry of addiction. *Neuropsychopharmacology*, **35**, 217–  
1047 238.
- 1048 Koshino, H., Minamoto, T., Ikeda, T., Osaka, M., Otsuka, Y., & Osaka, N. (2011) Anterior medial  
1049 prefrontal cortex exhibits activation during task preparation but deactivation during task execution.  
1050 *PLoS One*, **6**, e22909.
- 1051 Kunz, S., Beblo, T., Driessen, M., & Woermann, F. (2008) fMRI of alcohol craving after individual cues:  
1052 a follow-up case report. *Neurocase*, **14**, 343–346.
- 1053 LeDoux, J.E. (1996) *The Emotional Brain: The Mysterious Underpinnings of Emotional Life*. Simon &  
1054 Schuster.
- 1055 Lewis, B., Price, J.L., Garcia, C.C., & Nixon, S.J. (2019) Emotional Face Processing among Treatment-  
1056 Seeking Individuals with Alcohol Use Disorders: Investigating Sex Differences and Relationships  
1057 with Interpersonal Functioning. *Alcohol Alcohol*, **54**, 361–369.
- 1058 Loeber, S., Vollstädt-Klein, S., von der Goltz, C., Flor, H., Mann, K., & Kiefer, F. (2009) Attentional bias  
1059 in alcohol-dependent patients: the role of chronicity and executive functioning. *Addict. Biol.*, **14**,  
1060 194–203.
- 1061 Lubman, D.I. (2007) Addiction neuroscience and its relevance to clinical practice. *Drug Alcohol Rev.*, **26**,  
1062 1–2.

- 1063 Luhar, R.B., Sawyer, K.S., Gravitz, Z., Ruiz, S.M., & Oscar-Berman, M. (2013) Brain volumes and  
1064 neuropsychological performance are related to current smoking and alcoholism history.  
1065 *Neuropsychiatr. Dis. Treat.*, **9**, 1767–1784.
- 1066 Makris, N., Oscar-Berman, M., Jaffin, S.K., Hodge, S.M., Kennedy, D.N., Caviness, V.S., Marinkovic,  
1067 K., Breiter, H.C., Gasic, G.P., & Harris, G.J. (2008) Decreased volume of the brain reward system in  
1068 alcoholism. *Biological Psychiatry*, **64**, 192–202.
- 1069 Mann, K., Ackermann, K., Croissant, B., Mundle, G., Nakovics, H., & Diehl, A. (2005) Neuroimaging of  
1070 gender differences in alcohol dependence: Are women more vulnerable? *Alcoholism: Clinical &*  
1071 *Experimental Research*, **29**, 896–901.
- 1072 Margulies, D.S., Ghosh, S.S., Goulas, A., Falkiewicz, M., Huntenburg, J.M., Langs, G., Bezgin, G.,  
1073 Eickhoff, S.B., Castellanos, F.X., Petrides, M., Jefferies, E., & Smallwood, J. (2016) Situating the  
1074 default-mode network along a principal gradient of macroscale cortical organization. *Proc. Natl.*  
1075 *Acad. Sci. U. S. A.*, **113**, 12574–12579.
- 1076 Marinkovic, K., Oscar-Berman, M., Urban, T., O'Reilly, C.E., Howard, J.A., Sawyer, K., & Harris, G.J.  
1077 (2009) Alcoholism and dampened temporal limbic activation to emotional faces. *Alcohol. Clin. Exp.*  
1078 *Res.*, **33**, 1880–1892.
- 1079 Menon, V. (2011) Large-scale brain networks and psychopathology: a unifying triple network model.  
1080 *Trends Cogn. Sci.*, **15**, 483–506.
- 1081 Merrill, J.E. & Read, J.P. (2010) Motivational pathways to unique types of alcohol consequences.  
1082 *Psychol. Addict. Behav.*, **24**, 705–711.
- 1083 Mosher Ruiz, S., Oscar-Berman, M., Kempainen, M.I., Valmas, M.M., & Sawyer, K.S. (2017)  
1084 Associations between personality and drinking motives among abstinent adult alcoholic men and  
1085 women. *Alcohol Alcohol*, **52**, 496–505.
- 1086 Myrick, H., Anton, R.F., Li, X., Henderson, S., Drobles, D., Voronin, K., & George, M.S. (2004)  
1087 Differential brain activity in alcoholics and social drinkers to alcohol cues: relationship to craving.  
1088 *Neuropsychopharmacology*, **29**, 393–402.

- 1089 Myrick, H., Anton, R.F., Li, X., Henderson, S., Randall, P.K., & Voronin, K. (2008) Effect of naltrexone  
1090 and ondansetron on alcohol cue-induced activation of the ventral striatum in alcohol-dependent  
1091 people. *Arch. Gen. Psychiatry*, **65**, 466–475.
- 1092 Oscar-Berman, M., Hancock, M., Mildworf, B., Hutner, N., & Weber, D.A. (1990) Emotional perception  
1093 and memory in alcoholism and aging. *Alcohol. Clin. Exp. Res.*, **14**, 383–393.
- 1094 Oscar-Berman, M. & Maleki, N. (2019) Alcohol Dementia, Wernicke’s Encephalopathy, and Korsakoff’s  
1095 Syndrome. In Michael L. Alosco and Robert A. Stern (ed), *The Oxford Handbook of Adult Cognitive*  
1096 *Disorders*. Oxford University Press, pp. 743–758.
- 1097 Oscar-Berman, M., Ruiz, S.M., Marinkovic, K., Valmas, M.M., Harris, G.J., & Sawyer, K.S. (2019)  
1098 Brain responsivity to emotional faces differs in alcoholic men and women. *bioRxiv*, 496166.
- 1099 Oscar-Berman, M., Valmas, M.M., Sawyer, K.S., Ruiz, S.M., Luhar, R.B., & Gravitz, Z.R. (2014)  
1100 Profiles of impaired, spared, and recovered neuropsychologic processes in alcoholism. *Handb. Clin.*  
1101 *Neurol.*, **125**, 183–210.
- 1102 Philippot, P., Kornreich, C., Blairy, S., Baert, I., Den Dulk, A., Le Bon, O., Streel, E., Hess, U., Pelc, I., &  
1103 Verbanck, P. (1999) Alcoholics’ deficits in the decoding of emotional facial expression. *Alcohol.*  
1104 *Clin. Exp. Res.*, **23**, 1031–1038.
- 1105 Pourtois, G., Schwartz, S., Spiridon, M., Martuzzi, R., & Vuilleumier, P. (2009) Object representations  
1106 for multiple visual categories overlap in lateral occipital and medial fusiform cortex. *Cereb. Cortex*,  
1107 **19**, 1806–1819.
- 1108 Ray, S., Hanson, C., Hanson, S.J., & Bates, M.E. (2010) fMRI BOLD response in high-risk college  
1109 students (Part 1): during exposure to alcohol, marijuana, polydrug and emotional picture cues.  
1110 *Alcohol Alcohol*, **45**, 437–443.
- 1111 Reinhard, I., Leménager, T., Fauth-Bühler, M., Hermann, D., Hoffmann, S., Heinz, A., Kiefer, F.,  
1112 Smolka, M.N., Wellek, S., Mann, K., & Vollstädt-Klein, S. (2015) A comparison of region-of-  
1113 interest measures for extracting whole brain data using survival analysis in alcoholism as an  
1114 example. *J. Neurosci. Methods*, **242**, 58–64.

- 1115 Rivas-Grajales, A.M., Sawyer, K.S., Karmacharya, S., Papadimitriou, G., Camprodon, J.A., Harris, G.J.,  
1116 Kubicki, M., Oscar-Berman, M., & Makris, N. (2018) Sexually dimorphic structural abnormalities in  
1117 major connections of the medial forebrain bundle in alcoholism. *NeuroImage: Clinical*, **19**, 98–105.
- 1118 Robins, L.N., Cottler, L.B., Bucholz, K.K., Compton, W.M., North, C.S., & Rourke, K. (2000)  
1119 *Computerized Diagnostic Interview Schedule for the DSM-IV (C DIS-IV)*.
- 1120 Rubio, G., Martínez-Gras, I., Ponce, G., Quinto, R., Jurado, R., & Jiménez-Arriero, M.Á. (2013)  
1121 [Integration of self-guidance groups for relatives in a public program of alcoholism treatment].  
1122 *Adicciones*, **25**, 37–44.
- 1123 Ruiz, S.M. & Oscar-Berman, M. (2015) Gender and alcohol abuse: history and sociology. In Martin, S.C.  
1124 (ed), *Gender and Alcohol Abuse: History and Sociology, The SAGE Encyclopedia of Alcohol:  
1125 Social, Cultural, and Historical Perspectives*. Sage Publications Los Angeles, pp. 586–591.
- 1126 Ruiz, S.M., Oscar-Berman, M., Sawyer, K.S., Valmas, M.M., Urban, T., & Harris, G.J. (2013) Drinking  
1127 history associations with regional white matter volumes in alcoholic men and women. *Alcohol. Clin.  
1128 Exp. Res.*, **37**, 110–122.
- 1129 Ryan, F. (2002) Attentional bias and alcohol dependence: a controlled study using the modified stroop  
1130 paradigm. *Addict. Behav.*, **27**, 471–482.
- 1131 Saraceno, L., Heron, J., Munafò, M., Craddock, N., & van den Bree, M.B.M. (2012) The relationship  
1132 between childhood depressive symptoms and problem alcohol use in early adolescence: findings  
1133 from a large longitudinal population-based study. *Addiction*, **107**, 567–577.
- 1134 Sawyer, K.S., Adra, N., Salz, D.M., Kempainen, M.I., Ruiz, S.M., Harris, G.J., & Oscar-Berman, M.  
1135 (2020) Hippocampal subfield volumes in abstinent men and women with a history of alcohol use  
1136 disorder. *PLoS One*, **15**, e0236641.
- 1137 Sawyer, K.S., Maleki, N., Papadimitriou, G., Makris, N., Oscar-Berman, M., & Harris, G.J. (2018)  
1138 Cerebral white matter sex dimorphism in alcoholism: a diffusion tensor imaging study.  
1139 *Neuropsychopharmacology*, **43**, 1876–1883.
- 1140 Sawyer, K.S., Maleki, N., Urban, T., Marinkovic, K., Karson, S., Ruiz, S.M., Harris, G.J., & Oscar-

- 1141 Berman, M. (2019) Alcoholism gender differences in brain responsivity to emotional stimuli. *Elife*,  
1142 **8**.
- 1143 Sawyer, K.S., Oscar-Berman, M., Barthelemy, O.J., Papadimitriou, G.M., Harris, G.J., & Makris, N.  
1144 (2017) Gender dimorphism of brain reward system volumes in alcoholism. *Psychiatry Res*  
1145 *Neuroimaging*, **263**, 15–25.
- 1146 Sawyer, K.S., Poey, A., Ruiz, S.M., Marinkovic, K., & Oscar-Berman, M. (2015) Measures of skin  
1147 conductance and heart rate in alcoholic men and women during memory performance. *PeerJ*, **3**,  
1148 e941.
- 1149 Schacht, J.P., Anton, R.F., & Myrick, H. (2013) Functional neuroimaging studies of alcohol cue  
1150 reactivity: a quantitative meta-analysis and systematic review: Alcohol cue imaging. *Addict. Biol.*,  
1151 **18**, 121–133.
- 1152 Schneider, F., Habel, U., Wagner, M., Franke, P., Salloum, J.B., Shah, N.J., Toni, I., Sulzbach, C., Hömig,  
1153 K., Maier, W., Gaebel, W., & Zilles, K. (2001) Subcortical correlates of craving in recently abstinent  
1154 alcoholic patients. *Am. J. Psychiatry*, **158**, 1075–1083.
- 1155 Schulte, M.T., Ramo, D., & Brown, S.A. (2009) Gender differences in factors influencing alcohol use and  
1156 drinking progression among adolescents. *Clin. Psychol. Rev.*, **29**, 535–547.
- 1157 Ségonne, F., Dale, A.M., Busa, E., Glessner, M., Salat, D., Hahn, H.K., & Fischl, B. (2004) A hybrid  
1158 approach to the skull stripping problem in MRI. *NeuroImage*, **22**, 1060–1075.
- 1159 Seitz, J., Sawyer, K.S., Papadimitriou, G., Oscar-Berman, M., Ng, I., Kubicki, A., Mouradian, P., Ruiz,  
1160 S.M., Kubicki, M., Harris, G.J., & Makris, N. (2017) Alcoholism and sexual dimorphism in the  
1161 middle longitudinal fascicle: a pilot study. *Brain Imaging Behav.*, **11**, 1006–1017.
- 1162 Seo, D., Jia, Z., Lacadie, C.M., Tsou, K.A., Bergquist, K., & Sinha, R. (2011) Sex differences in neural  
1163 responses to stress and alcohol context cues. *Human Brain Mapping*, **32**, 1998–2013.
- 1164 Sharma, D., Albery, I.P., & Cook, C. (2001) Selective attentional bias to alcohol related stimuli in  
1165 problem drinkers and non-problem drinkers. *Addiction*, **96**, 285–295.
- 1166 Shields, C.N. & Gremel, C.M. (2020) Review of orbitofrontal cortex in alcohol dependence: A disrupted

- 1167 cognitive map? *Alcohol. Clin. Exp. Res.*, **44**, 1952–1964.
- 1168 Sinha, R., Fox, H.C., Hong, K.A., Bergquist, K., Bhagwagar, Z., & Siedlarz, K.M. (2009) Enhanced  
1169 negative emotion and alcohol craving, and altered physiological responses following stress and cue  
1170 exposure in alcohol dependent individuals. *Neuropsychopharmacology*, **34**, 1198–1208.
- 1171 Sled, J.G., Zijdenbos, A.P., & Evans, A.C. (1998) A nonparametric method for automatic correction of  
1172 intensity nonuniformity in MRI data. *IEEE Transactions on Medical Imaging*, **17**, 87–97.
- 1173 Sormaz, M., Murphy, C., Wang, H.-T., Hymers, M., Karapanagiotidis, T., Poerio, G., Margulies, D.S.,  
1174 Jefferies, E., & Smallwood, J. (2018) Default mode network can support the level of detail in  
1175 experience during active task states. *Proc. Natl. Acad. Sci. U. S. A.*, **115**, 9318–9323.
- 1176 Stritzke, W.G.K., Breiner, M.J., Curtin, J.J., & Lang, A.R. (2004) Assessment of substance cue reactivity:  
1177 advances in reliability, specificity, and validity. *Psychol. Addict. Behav.*, **18**, 148–159.
- 1178 Talairach, J. & Tournoux, P. (1988) *Co-Planar Stereotaxic Atlas of the Human Brain: 3-Dimensional*  
1179 *Proportional System : An Approach to Cerebral Imaging*. G. Thieme, Stuttgart.
- 1180 Tapert, S.F., Cheung, E.H., Brown, G.G., Frank, L.R., Paulus, M.P., Schweinsburg, A.D., Meloy, M.J., &  
1181 Brown, S.A. (2003) Neural response to alcohol stimuli in adolescents with alcohol use disorder.  
1182 *Arch. Gen. Psychiatry*, **60**, 727–735.
- 1183 Thesen, S., Heid, O., Mueller, E., & Schad, L.R. (2000) Prospective acquisition correction for head  
1184 motion with image-based tracking for real-time fMRI. *Magn. Reson. Med.*, **44**, 457–465.
- 1185 Thompson-Schill, S.L., Jonides, J., Marshuetz, C., Smith, E.E., D’Esposito, M., Kan, I.P., Knight, R.T., &  
1186 Swick, D. (2002) Effects of frontal lobe damage on interference effects in working memory. *Cogn.*  
1187 *Affect. Behav. Neurosci.*, **2**, 109–120.
- 1188 Tops, M., Boksem, M.A.S., Quirin, M., IJzerman, H., & Koole, S.L. (2014) Internally directed cognition  
1189 and mindfulness: an integrative perspective derived from predictive and reactive control systems  
1190 theory. *Front. Psychol.*, **5**, 429.
- 1191 Townshend, J.M. & Duka, T. (2001) Attentional bias associated with alcohol cues: differences between  
1192 heavy and occasional social drinkers. *Psychopharmacology*, **157**, 67–74.

- 1193 Uddin, L.Q., Yeo, B.T.T., & Spreng, R.N. (2019) Towards a universal taxonomy of macro-scale  
1194 functional human brain networks. *Brain Topogr.*, **32**, 926–942.
- 1195 Verplaetse, T.L., Cosgrove, K.P., Tanabe, J., & McKee, S.A. (2021) Sex/gender differences in brain  
1196 function and structure in alcohol use: A narrative review of neuroimaging findings over the last 10  
1197 years. *J. Neurosci. Res.*, **99**, 309–323.
- 1198 Volkow, N.D., Wang, G.-J., Tomasi, D., & Baler, R.D. (2013) The addictive dimensionality of obesity.  
1199 *Biological Psychiatry*, **73**, 811–818.
- 1200 Vollstädt-Klein, S., Loeber, S., Kirsch, M., Bach, P., Richter, A., Bühler, M., von der Goltz, C., Hermann,  
1201 D., Mann, K., & Kiefer, F. (2011) Effects of cue-exposure treatment on neural cue reactivity in  
1202 alcohol dependence: a randomized trial. *Biol. Psychiatry*, **69**, 1060–1066.
- 1203 Wechsler, D. (1997) *WAIS-III, Wechsler Adult Intelligence Scale, Third Edition: WMS-III, Wechsler*  
1204 *Memory Scale, Third Edition: Technical Manual*. Psychological Corporation, San Antonio, TX.
- 1205 Wiers, C.E., Stelzel, C., Park, S.Q., Gawron, C.K., Ludwig, V.U., Gutwinski, S., Heinz, A., Lindenmeyer,  
1206 J., Wiers, R.W., Walter, H., & Berman, F. (2014) Neural correlates of alcohol-approach bias in  
1207 alcohol addiction: the spirit is willing but the flesh is weak for spirits. *Neuropsychopharmacology*,  
1208 **39**, 688–697.
- 1209 Woo, C.-W., Krishnan, A., & Wager, T.D. (2014) Cluster-extent based thresholding in fMRI analyses:  
1210 pitfalls and recommendations. *Neuroimage*, **91**, 412–419.
- 1211 World Health Organization (2019) *Global Status Report on Alcohol and Health 2018*. World Health  
1212 Organization.
- 1213 Wrase, J., Grüsser, S.M., Klein, S., Diener, C., Hermann, D., Flor, H., Mann, K., Braus, D.F., & Heinz,  
1214 A. (2002) Development of alcohol-associated cues and cue-induced brain activation in alcoholics.  
1215 *Eur. Psychiatry*, **17**, 287–291.
- 1216 Yeo, B.T.T., Krienen, F.M., Eickhoff, S.B., Yaakub, S.N., Fox, P.T., Buckner, R.L., Asplund, C.L., &  
1217 Chee, M.W.L. (2016) Functional specialization and flexibility in human association cortex. *Cereb.*  
1218 *Cortex*, **26**, 465.

- 1219 Zhang, R. & Volkow, N.D. (2019) Brain default-mode network dysfunction in addiction. *Neuroimage*,  
1220 **200**, 313–331.
- 1221 Zhou, H.-X., Chen, X., Shen, Y.-Q., Li, L., Chen, N.-X., Zhu, Z.-C., Castellanos, F.X., & Yan, C.-G.  
1222 (2020) Rumination and the default mode network: Meta-analysis of brain imaging studies and  
1223 implications for depression. *Neuroimage*, **206**, 116287.
- 1224
